# **SMC progressively aligns chromosomal arms in *Caulobacter crescentus* but is antagonized by convergent transcription**

Ngat T. Tran<sup>1</sup>, Michael T. Laub<sup>2,3</sup> and Tung B. K. Le<sup>1\*</sup>

<sup>1</sup>Department of Molecular Microbiology

John Innes Centre, Norwich, NR4 7UH, United Kingdom

<sup>2</sup>Department of Biology

<sup>3</sup>Howard Hughes Medical Institute

Massachusetts Institute of Technology, Cambridge, MA 02139, USA

\*Correspondence: tung.le@jic.ac.uk

## ABSTRACT

The Structural Maintenance of Chromosomes (SMC) complex plays an important role in chromosome organization and segregation in most living organisms. In *Caulobacter crescentus*, SMC is required to align the left and the right arms of the chromosome that run in parallel down the long axis of the cell. However, the mechanism of SMC-mediated alignment of chromosomal arms remains elusive. Here, using a genome-wide chromosome conformation capture assay (Hi-C), chromatin immunoprecipitation with deep sequencing (ChIP-seq) and microscopy of single cells, we show that *Caulobacter* SMC is recruited to the centromeric *parS* site and that SMC-mediated arm alignment depends on the chromosome partitioning protein ParB. We provide evidence that SMC likely tethers the *parS*-proximal regions of the chromosomal arms together, promoting arm alignment. Strikingly, the co-orientation of DNA replication and the transcription of highly-expressed genes is crucial for chromosome-wide alignment. Highly-transcribed genes near *parS* that are oriented against DNA replication disrupt arm alignment suggesting that head-on transcription interferes with SMC translocation and arm alignment. Our results demonstrate a tight interdependence of bacterial chromosome organization and global patterns of transcription.

## INTRODUCTION

The chromosomes of all organisms must be compacted nearly three orders of magnitude to fit within the limited volume of a cell. However, DNA cannot be haphazardly packed, and instead it must be organized in a way that is compatible with numerous cellular processes that share the same DNA template, including transcription, DNA replication, and chromosome segregation. This is particularly challenging in bacteria since these chromosome-based transactions happen concomitantly rather than being separated temporally, as in eukaryotes. Application of microscopy-based analyses of fluorescently-labeled DNA loci along with genome-wide chromosome conformation capture assays (Hi-C) have revealed a well-defined *in vivo* three-dimensional organization of bacterial chromosomes (Badrinarayanan et al., 2015a; Le et al., 2013; Umbarger et al., 2011; Viollier et al., 2004; Wang et al., 2013). Hi-C provides quantitative information about the spatial proximity of DNA loci *in vivo* by measuring the frequencies of crosslinking between different regions of the chromosome (Lieberman-Aiden et al., 2009). The first application of Hi-C to bacteria examined the *Caulobacter crescentus* chromosome (Le et al., 2013). Hi-C analysis of *Caulobacter* confirmed the global pattern of chromosome organization: in cells with a single chromosome, the origin of replication (*ori*) is at one cell pole, the terminus (*ter*) is near the opposite pole, and the two chromosomal arms are well-aligned, running in parallel down the long axis of the cell (Le et al., 2013; Viollier et al., 2004) (Fig. 1A). We discovered that a Structural Maintenance of Chromosomes protein (SMC) is crucial for the alignment of the left and right arm of the chromosome in *Caulobacter* (Le et al., 2013), but how SMC achieves this alignment remains poorly understood.

SMC proteins are widely conserved from bacteria to humans. In eukaryotes, SMC1 and SMC3, together with accessory proteins, form a cohesin complex that holds sister chromatids together until after they achieve a bipolar attachment to the mitotic spindle. The related condensin complex, comprised of SMC2, SMC4, and interacting partners, promotes the compaction of individual chromosomes during mitosis. In most bacteria, there is a single SMC composed of an ATPase “head” domain, a dimerisation “hinge” domain, and an extended antiparallel coiled-coil region in the middle (Nolivos and Sherratt, 2014) (Fig. S1A). Two SMC monomers dimerise, and together with the bacteria-specific proteins ScpA and ScpB, form a tripartite ring that can bring distal DNA segments close together to help organize bacterial chromosomes (Bürmann et al., 2013; Hirano et al., 2001; Mascarenhas et al., 2002; Soppa et al., 2002) (Fig. S1A). The topological entrapment of DNA by a ring-shaped SMC complex has been shown for cohesin and condensin, and for a Gram-positive *Bacillus subtilis* SMC (Cuylen et al., 2011; Ivanov and Nasmyth, 2005; Murayama and Uhlmann, 2014; Wilhelm et al., 2015). It is likely that topological entrapment is a general feature of all SMC complexes.

How SMC gets loaded onto DNA and topologically entraps DNA is generally well-studied in eukaryotes but not yet completely understood (reviewed in Uhlmann, 2016). In bacteria, SMC loading, translocation and DNA entrapment is less well known, but likely involves the ParA-ParB-*parS* system (Gruber and Errington, 2009; Lin and Grossman, 1998; Livny et al., 2007; Minnen et al., 2011; Sullivan et al., 2009). ParB is a site-specific DNA-binding protein that nucleates on a centromere-like *parS* sequence (Mohl and Gober, 1997; Mohl et al., 2001; Toro et al., 2008) and then spreads non-specifically along the DNA, likely forming a large nucleoprotein complex (Breier and Grossman, 2007; Graham et al., 2014; Taylor et al., 2015). ParA, a Walker-box ATPase, interacts with ParB and is required for the segregation of the ParB-DNA complex, and ultimately for the partitioning of replicated chromosomes to daughter cells (Figge et al., 2003; Lim et al., 2014). In *B. subtilis*, ParB loads SMC onto the chromosome mainly at the *ori*-proximal *parS* sites (Gruber and Errington, 2009; Marbouty et al., 2015; Minnen et al., 2016; Wang et al., 2015). Loaded SMC then translocates from *parS* to distal parts of the chromosome in an ATP hydrolysis-dependent manner (Minnen et al., 2016; Wang et al., 2017). This action is thought to individualize the origins of replicated chromosomes, thereby helping to segregate replicated chromosomes to opposite daughter cells. It has been

proposed that *B. subtilis* SMC loaded at *parS* translocates the full length of the chromosome to the terminus to promote chromosome arm alignment (Gruber and Errington, 2009; Minnen et al., 2016; Wang et al., 2017). However, ChIP-seq studies indicate that *B. subtilis* SMC is most enriched near *ori*, so whether SMC directly promotes arm alignment uniformly across the genome is unclear (Minnen et al., 2016; Wang et al., 2017).

*Caulobacter* harbours both a canonical SMC-ScpA-ScpB complex as well as a ParA-ParB-*parS* system. The ParA-ParB-*parS* complex is essential and cells lacking ParB are not viable (Mohl and Gober, 1997). In contrast, *Caulobacter* SMC is not required for survival in laboratory conditions (Le et al., 2013). *Caulobacter* cells lacking SMC grow slightly slower but are not temperature sensitive nor prone to accumulating suppressor mutations as originally suggested (Jensen and Shapiro, 1999). Nevertheless, an ATPase-defective *smc* mutant shows a severe defect in sister chromosome segregation in this bacterium, suggesting that *Caulobacter* SMC is also playing a role in chromosome segregation (Schwartz and Shapiro, 2011).

How SMC influences other cellular processes like transcription and is, in turn, influenced by these processes, is not well understood. Abundant, multi-subunit RNA polymerases can translocate through some DNA-bound proteins (Epshtein et al., 2003). In yeast, cohesin is pushed along the chromosome in the same direction as transcription, without dissociating (Lengronne et al., 2004; Ocampo-Hafalla et al., 2016). Similarly, in budding yeast, RNA polymerase can drive the short-range relocation of condensin (D'Ambrosio et al., 2008; Johzuka and Horiuchi, 2007). Whether bacterial RNA polymerase affects SMC has not been systematically investigated. Notably, in almost all bacteria, most genes, especially highly-expressed genes, are transcribed in the same direction as replication, *i.e.* from *ori* to *ter* (Guy and Roten, 2004; Rocha, 2008; Rocha and Danchin, 2003). This co-orientation of genes could help push SMC from *ori* to *ter*, alternatively, or in addition, genes transcribed in a head-on orientation could antagonize the translocation of SMC.

Here, we use Hi-C and chromatin immunoprecipitation with sequencing (ChIP-seq), together with microscopy-based analysis of single cells to elucidate the role and the mechanism of SMC in the global organization of the *Caulobacter* chromosome. We provide evidence that (i) SMC is required for the progressive alignment of the two chromosomal arms, proceeding in the *ori-ter* direction; (ii) *Caulobacter* SMC is loaded onto the chromosome at the centromeric *parS* site and ParB is essential for the SMC-mediated arm alignment; (iii) *Caulobacter* SMC most likely functions as a tether to actively cohes the chromosomal arms together; and (iv) head-on transcription can profoundly disrupt the alignment of chromosomal arms, likely by interfering with SMC translocation from the centromeric *parS* site. Altogether, our results demonstrate a tight interdependence of bacterial chromosome organization and global patterns of transcription.

## RESULTS

### The SMC-ScpA-ScpB complex is required for the alignment of chromosomal arms

*Caulobacter* cells lacking SMC show a dramatic reduction in inter-arm DNA-DNA interactions (Le et al., 2013) (Fig. 1B, Fig. S1B). To test whether the *Caulobacter* ScpA and ScpB homologs are also required for inter-arm interactions we generated Hi-C contact maps for  $\Delta scpA$  and  $\Delta scpB$  cells (Fig. 1B-D, Fig. S1B). Each strain was grown to exponential phase and then synchronized to obtain a homogeneous population of G1-phase cells before fixing with 1% formaldehyde and performing Hi-C. To generate Hi-C contact maps from the raw sequencing data, we divided the *Caulobacter* genome into 10-kb bins and assigned to corresponding bins the interaction frequencies of informative ligation products (see Methods). Interaction frequencies were visualized as a matrix with each matrix element,  $m_{ij}$ , indicating the logarithm of the relative interaction frequency of DNA loci in bin  $i$  with those in bin  $j$ . To emphasize the *ori*-proximal region, we oriented the Hi-C contact maps such that the *ori* (0 kb

or 4043 kb) is at the center of the x- and y-axis, and the left and the right chromosomal arm are on either side (Fig. 1B).

On the contact map of wild-type *Caulobacter*, the primary and high-interaction diagonal represents interactions between DNA on the same arm of the chromosome, *i.e.* intra-arm contacts, while the less prominent secondary diagonal represents DNA-DNA interactions between opposite arms, *i.e.* inter-arm contacts (Fig. 1B). Note that, in contrast to Hi-C maps reported previously (Le et al., 2013), here we use the logarithm of interaction frequencies to facilitate visualization of these weaker inter-arm interactions. The diagonal pattern of inter-arm contacts on a Hi-C map indicates that each locus on one chromosomal arm interacts with a locus roughly equidistant from the *ori* on the opposite arm, reflecting a global alignment of the chromosomal arms. Consistent with our previous studies (Le et al., 2013), the inter-arm interactions are significantly reduced in a  $\Delta smc$  strain. The Hi-C map for  $\Delta scpB$  revealed a similar decrease in inter-arm interactions, with no strong or obvious change in intra-arm interactions (Fig. 1C-D, Fig. S1B). The Hi-C map for  $\Delta scpA$  also exhibited a decrease in inter-arm interactions, though not nearly as significant as for  $\Delta smc$  and  $\Delta scpB$  (Fig. 1C-D, Fig. S1B). These data are consistent with ScpA and ScpB forming a complex with SMC that promotes the co-linearity of chromosomal arms in *Caulobacter*.

### **ParB induces a progressive alignment of chromosomal arms from *ori* to *ter***

In Gram-positive bacteria such as *B. subtilis* and *Streptococcus pneumoniae*, SMC is loaded onto the chromosome by ParB at *ori*-proximal *parS* sites (Gruber and Errington, 2009; Minnen et al., 2011; Sullivan et al., 2009). To test whether this mechanism is conserved in *Caulobacter*, a distantly related Gram-negative bacterium, we used a strain where ParB, which is essential for viability, can be depleted (Mohl and Gober, 1997; Thanbichler and Shapiro, 2006). The promoter of *parB* at its native chromosomal locus was replaced with a xylose-inducible promoter,  $P_{xyl}$ . Cells grown to exponential phase in the presence of xylose were then washed free of xylose and incubated for five hours in a rich medium supplemented with glucose to inhibit  $P_{xyl}$  activity. Immunoblot analysis with an  $\alpha$ -ParB antibody indicated ~2.5 fold decrease in ParB concentration after the five hours in glucose ( $T = 0$  min, Fig. S2A). These cells were then fixed with 1% formaldehyde and examined by Hi-C. The contact map of ParB-depleted cells exhibited a clear reduction in inter-arm contacts, similar to  $\Delta smc$  cells, indicating a role of ParB in maintaining chromosomal arm alignment, possibly by loading SMC onto DNA (Fig. 2A-B, Fig. S2B).

As with *B. subtilis* SMC (Gruber and Errington, 2009; Wang et al., 2015), the *Caulobacter* SMC complex may be recruited and loaded onto DNA via a direct interaction with ParB. If so, we reasoned that overexpressing a strong ParB-interacting protein might prevent interactions with SMC and, in turn, disrupt alignment of the chromosomal arms. To test this hypothesis, we performed Hi-C on cells overexpressing a YFP-tagged variant of ParA harboring a K20R substitution. ParA(K20R) is defective in ATP binding and was suggested to bind ParB more tightly than wild-type ParA (Shebelut et al., 2010). Consistent with that conclusion, we found, using a yeast two-hybrid assay, that ParA(K20R) and ParB produced five-fold more activity with a  $\beta$ -galactosidase reporter than did ParA and ParB (Fig. 2C). The Hi-C contact map for a strain overexpressing ParA(K20R) showed a modest, but significant decrease in chromosomal arm alignment compared to a control strain overexpressing wild-type ParA (Fig. 2D-E, Fig. S2C). This result reinforces our conclusion that ParB is required for the SMC-mediated alignment of chromosomal arms in *Caulobacter*.

We hypothesized that ParB helps load SMC onto the chromosome at *parS* sites, leading to the SMC-mediated alignment of chromosomal arms. This model predicts that chromosome arm alignment by SMC starts at, or near, *parS* and then progresses toward the terminus. To investigate the directionality and dynamics of chromosome arm alignment, we again depleted ParB by growing cells in rich medium with glucose for 5 hours, and then added back xylose to induce ParB *de novo*. Samples were taken 0, 5, 10, 15, 25 and 30 minutes after xylose addition



and immediately fixed for Hi-C analysis. Immunoblot analysis with  $\alpha$ -ParB antibody showed gradual accumulation of new ParB after adding back xylose (Fig. S2A). At the 0 and 5 minute time points, we observed very little inter-arm interaction, as above (Fig. 2F, Fig. S2D-E). However, over time, the inter-arm interactions increased, beginning close to *ori* and *parS* and then extending toward *ter* (Fig. 2F-G, Fig. S2D-E). The two arms aligned directionally at a rate of ~19 kb per minute (~320 bp per second) and ~16 kb per minute (~267 bp per second) for the left and right arm, respectively (Fig. 2F-G). These data are consistent with a model in which SMC is loaded by ParB, likely at *parS* sites, and then translocates down the arms toward *ter*, driving their alignment.

The *parS* site found adjacent to the *parAB* operon is ~8 kb from *ori* in *Caulobacter crescentus* (Toro et al., 2008). To directly test the model that SMC is loaded onto DNA at *parS* sites, we inserted a 260-bp DNA fragment containing a *parS* site ~1800 kb from *ori*, near the chromosomal terminus (Fig. 3A). We verified that this ectopic *parS* site was sufficient to recruit ParB, using ChIP-seq analysis of ParB, which binds to the native *parS* site (Fig. 3B). ChIP-seq of CFP-tagged ParB indicated that most ParB remains associated with the native *ori*-proximal *parS* site, but with a significant fraction of ParB also recruited to the ectopic *parS* at +1800 kb (Fig. 3B). We then performed Hi-C on the strain harboring the additional *parS* site and observed a new secondary diagonal, emanating from the approximate position of the ectopic *parS* site (Fig. 3C). The extent of alignment from this ectopic site was less than that associated with the original *parS*, an issue examined in depth below. We also inserted a second *parS* at +2240 kb, and this was again sufficient to recruit ParB and induce an alignment of the flanking DNA (Fig. 3). Taken together, our results support a model in which ParB loads SMC at *parS* sites, leading to the subsequent progressive alignment of flanking DNA.

### SMC promotes DNA alignment most effectively for *parS*-proximal genomic regions

After being loaded at *parS* sites, SMC likely translocates down the chromosomal arms to drive their alignment. Strikingly however, the extent of inter-arm interactions was not uniform across the entire chromosome indicating that each loaded SMC complex may not travel the entire length of the chromosome. In fact, we noted that in wild-type cells, inter-arm interactions reduced gradually away from *parS*, leveling out after ~600 kb in either direction (Fig. 1D). Similarly, in the strains in which an ectopic *parS* site was inserted 1800 kb or 2200 kb from the origin (Fig. 3), the extent to which flanking DNA was "zipped up" and aligned was limited to only a few hundred kilobases.

These observations suggested that SMC is not uniformly distributed across the chromosome and instead may be enriched in the regions showing highest inter-arm interactions. To test this idea, we first used ChIP-seq to map the genome-wide distribution of epitope tagged-SMC. We fused the SMC-encoding gene to a FLAG tag at the N-terminus and placed this allele of *smc* downstream of a xylose-inducible promoter ( $P_{xyl}$ ) on a medium-copy-number plasmid. We then performed Hi-C on  $\Delta smc$  cells that produced this FLAG-tagged SMC via leaky expression from  $P_{xyl}$  (Fig. S3A). Chromosomal arm alignment was comparable to the wild-type level (Fig. S3B-C), indicating that FLAG-SMC is functional. Overproducing FLAG-SMC in the  $\Delta smc$  background by adding xylose did not extend arm alignment beyond the wild-type level (Fig. S3B-C). For ChIP, the  $\Delta smc$   $P_{xyl}$ -*flag-smc* strain was grown to exponential phase in a rich medium at 30°C, washed with phosphate-buffered saline and then fixed with 1% formaldehyde and crosslinker Gold for immunoprecipitation. SMC-bound DNA was isolated using  $\alpha$ -FLAG antibody coupled to sepharose beads. The immunoprecipitated DNA was deep sequenced and mapped back to the *Caulobacter* genome to reveal enriched genomic sites. As a negative control, we performed  $\alpha$ -FLAG ChIP-seq on wild-type *Caulobacter*, i.e. cells with untagged SMC (Fig. S3D). Individual sequence reads were allocated to regular 1 kb bins along the *Caulobacter* chromosome. ChIP-seq signals were reported as number of reads within each 1 kb bin in the ChIP fraction of FLAG-tagged SMC minus that of untagged SMC to normalize for non-specific immunoprecipitation (Fig. 4A). Although modest, we observed a clear enrichment of SMC-bound DNA near the *parS* site (~8 kb from the *ori*, on the left arm) (Fig. 4A), consistent

with SMC loading at *parS*. SMC decreases in enrichment away from *parS* but is slightly enhanced close to the *ter* area (Fig. 4A and the Discussion). We also noted the enrichment of SMC at highly transcribed genes (Fig. 4A-B), most likely as an artefact of non-specific immunoprecipitation (Minnen et al., 2016; Nolivos et al., 2016; Teytelman et al., 2013)

Most notably, FLAG-tagged SMC was enriched above background in a region overlapping *parS* that extended from approximately +3680 kb to +345 kb, the same approximate region that shows the most extensive inter-arm alignment by Hi-C (Fig. 1D, Fig. 4A, Fig. S4A). We could not detect significant enrichment of FLAG-tagged SMC beyond this *parS*-proximal region, indicating that SMC is either not appreciably bound to *parS*-distal regions of the chromosome or its association drops below our limit of detection with ChIP-seq. In either case, we conclude that (i) SMC is not uniformly distributed across the genome and (ii) the enrichment of SMC is strongly correlated with the extent of chromosome arm alignment at the *ori*-proximal region.

To further test the relationship of SMC enrichment and the alignment of flanking DNA, we generated a strain bearing a relatively large inversion (involving genomic DNA normally between +3611 and +4038 kb) such that *parS* is relocated ~427 kb away from *ori*; this strain is referred to as the Flip 1-5 strain (Fig. 4B). ChIP-seq of FLAG-tagged SMC in the Flip 1-5 inversion strain showed an enrichment of DNA surrounding the relocated *parS* site at a peak level comparable to the *ori*-proximal *parS* (Fig. 4A-B), further supporting the conclusion that SMC is loaded by ParB at *parS*, and that SMC enrichment near *parS* is independent of *ori*.

The Hi-C contact map of the Flip 1-5 inversion strain showed a secondary diagonal akin to that in wild-type cells (Fig. 4C). However, the starting point of the arm/flanking DNA alignment was shifted and coincided with the genomic position of the relocated *parS* (Fig. 4C). This ectopic arm alignment was reduced dramatically in the absence of *smc* (Fig. 4C-D), indicating that arm alignment in the Flip 1-5 strain still depends on SMC. For the Flip 1-5 strain, the inter-arm alignment was again strongest in a limited region around *parS*, extending approximately 330 kb in each direction (Fig. 4D, Fig. S4B). The extent of arm alignment in the Flip 1-5 strain was approximately half that of wild-type cells (~600 kb), consistent with the reduced region showing SMC enrichment by ChIP-seq (Fig. 4B, Fig. S4B).

Collectively, the data presented thus far suggest that SMC loaded at *parS* may only translocate a limited way down the chromosome, or that most SMC molecules loaded translocate a limited distance. If so, we predicted that if the chromosome expanded, as occurs in elongating, G1-arrested cells, then *parS*-proximal regions would (i) remain better aligned than other chromosomal regions and (ii) exhibit a stronger dependence on *smc* for alignment (Fig. S5A). To test this model, we fluorescently labeled pairs of DNA loci, at equivalent distances from *ori*, but on opposite arms of the chromosome, using an orthogonal ParB/*parS* system (Badrinarayanan et al., 2015b). A pair of DNA loci were engineered at +200 kb and +3842 kb, i.e. within the *parS*-proximal domain showing strongest SMC enrichment and highest inter-arm Hi-C values. Another pair of DNA loci were labeled in the middle of each arm (+1000 kb and +3042 kb). And finally, to investigate chromosomal arm alignment near *ter*, a pair of DNA loci at +1800 kb and +2242 kb were fluorescently labelled. We then measured, for each pair of loci, inter-focus distances in a population of otherwise wild-type and  $\Delta smc$  cells (Fig. 4E). To allow cells to elongate and expand their chromosomes, we measured inter-focus distances in cells where the only copy of *dnaA* was driven by an IPTG-regulated  $P_{lac}$  promoter. Washing cells free of IPTG produced a population of cells that each contained just one copy of the chromosome and continued to grow but were unable to divide, leading to an elongated cell where the chromosome fills the entire available cytoplasmic space (Kahng and Shapiro, 2003; Le and Laub, 2016).

As cell length increased with time, we observed that the mean inter-focus distances for each pair of DNA loci also increased, consistent with an overall expansion of the chromosome (Fig. 4E). However, the rate of expansion was different, depending on genomic locations of labelled

DNA loci. The inter-focus distance for the *parS*-proximal, 200 kb-3842 kb pair increased only modestly,  $\sim 0.5 \mu\text{m}$  as the cell length tripled (Fig. 4E). In contrast, the inter-focus distance for loci in the middle of the chromosome arms increased  $\sim 1.5 \mu\text{m}$  on average as the cell length tripled (Fig. 4E). Importantly, the inter-focus distance of the *ori*-proximal loci, but not the other locus pairs, increased in the  $\Delta\text{smc}$  background (Fig. 4E). These microscopy-based analyses support our hypothesis that SMC most effectively aligns the chromosome arms nearest the *ori* and *parS* site where it is loaded.

In parallel, we analyzed Hi-C data on the elongated cells resulting from DnaA depletion (Fig. S5B-C) (Le and Laub, 2016). We observed that  $\sim 300$  kb surrounding *parS* remains well-aligned even in elongated cells 3 hrs after IPTG withdrawal (Fig. S5B-C). In contrast, chromosomal arm alignment elsewhere on the chromosome was rapidly lost to the same extent as in  $\Delta\text{smc}$  cells after withdrawing IPTG for 2 hrs (Fig. S5D-E). These results agree well with the single-cell microscopy results and together suggest that *Caulobacter* SMC functions most effectively to align chromosomal arms in close proximity to *ori/parS*.

### Conflicts with transcription influence the SMC-mediated alignment of chromosomal arms

Collectively, our results indicate that SMC is predominantly associated with the *parS*-proximal region of the chromosome, leading to strongest arm-arm interactions within this region. Additionally, we noted two other features of the arm-arm interactions assessed by Hi-C and ChIP-seq. First, the frequencies of inter-arm interactions extended slightly faster along the left arm compared to the right arm (Fig. 2G). Second, the region showing the strongest inter-arm interactions did not extend as far from *parS* in the Flip 1-5 strain or in the strains harboring the ectopic *parS* sites near *ter* (Fig. 3C, Fig. 4C-D). These observations suggested that the genomic context surrounding *parS* may influence the translocation of SMC along each arm of the chromosome and, consequently, the patterns of inter-arm interaction.

We hypothesized that highly-expressed genes, particularly those oriented toward *parS*, may limit the translocation of SMC. To test this idea, we engineered a strain, hereafter called Flip 2-5, in which a  $\sim 419$  kb DNA segment between +3611 kb and +4030 kb on the left arm was inverted (Fig. 5A, Fig. 6A). This inversion leaves *parS* at its original location,  $\sim 8$  kb from *ori*, but dramatically changes the genomic context of the flanking DNA on one side of *parS* while leaving the other side unperturbed (Fig. 5A, Fig. S6A-B). Based on RNA-seq data collected from *Caulobacter* cells growing exponentially in rich medium (Le and Laub, 2016), we chose this segment for inversion as it contains several highly-expressed genes, including a ribosomal rRNA gene cluster and genes encoding ATP synthase, the glycine cleavage system, and cytochrome c oxidase, that all normally read in the *ori-ter* direction, *i.e.* co-directionally with replication and SMC translocation (Fig. 5A, Fig. S6A-B) (Le and Laub, 2016).

To assess the density of RNA polymerases directly, we performed ChIP-seq on exponentially-growing cells producing RpoC-FLAG as the only version of RNA polymerase  $\beta'$  subunit (Fig. 5A, Fig. S6A-B). Separating sequencing reads based on the direction of transcription clearly demonstrated an enrichment of highly-expressed genes transcribed in the *ori-ter* direction in wild-type cells between +3611 and +4030 kb (Fig. 5A, Fig. S6A). We also confirmed, using ChIP-seq on RpoC-FLAG, that these same genes remain highly expressed in the Flip 2-5 background, but now on the opposite strand such that they read in a *ter-ori* direction, *i.e.* head-on with replication and SMC translocation from *parS* (Fig. 5A, Fig. S6B).

The Hi-C contact map of G1-phase Flip 2-5 cells showed, in sharp contrast to wild-type cells, a pronounced asymmetrical pattern of inter-arm interactions (Fig. 5B, Fig. S7A-B). The inter-arm interactions in the Flip 2-5 strain manifested as a nearly vertical streak in the Hi-C map, still emanating from a *parS*-proximal position (Fig. 5B). This vertical streak indicates that the strongest inter-arm interactions now occur between an  $\sim 50$ -80 kb region of DNA on the left side of *parS* with an  $\sim 400$  kb segment on the right arm of the chromosome, a pronounced



asymmetry compared to the pattern in wild-type cells (Fig. 5B). We confirmed that this asymmetric pattern of inter-arm interactions in the Flip 2-5 strain is still dependent on SMC as this vertical streak disappeared from the contact map of Flip 2-5  $\Delta smc$  cells (Fig. 5B). These results strongly suggest that the genomic context of DNA flanking the *parS* site, and likely the orientation of highly expressed genes, can dramatically influence the pattern of inter-arm contacts.

To assess whether the Flip 2-5 strain also led to a change in the genomic distribution of SMC, we performed ChIP-seq on FLAG-SMC in the Flip 2-5 background (Fig. 6, Fig. S4C). The enrichment of SMC dropped off slightly faster in the first ~150 kb away from *parS*, in the *ori*-*ter* direction, in the Flip 2-5 strain compared to wild type (Fig. 6A, Fig. S4C, Fig. S7C). However, most strikingly, the Flip 2-5 strain exhibited a series of new SMC ChIP-seq peaks, in addition to the one at *parS*, particularly in the region that was inverted (Fig. 6). Comparing the SMC and RpoC ChIP-seq profiles indicated that these new SMC peaks coincided with the highly expressed gene clusters that had been reoriented in the inversion to read toward *ori* and *parS* (Fig. 6C). These new peaks are not artefacts that are normally associated with highly-transcribed genes since (i) they are unique in Flip 2-5 cells but not in the wild type or Flip 1-5 control, and (ii) the shape and the magnitude of the unique peaks in Flip 2-5 are distinct from that of wild type and the Flip 1-5 cells (Fig. 6C). These data strongly suggested that transcription in a head-on orientation with respect to the direction of replication can either impede SMC translocation away from *parS* or drive the dissociation of SMC from DNA, limiting the extent of inter-arm contacts and, in some cases, produce an asymmetrical pattern of inter-arm contacts by Hi-C.

To test whether the asymmetrical inter-arm interactions in the Flip 2-5 strain arise because of the reoriented, highly expressed genes within the inverted genomic region, we first tested whether inhibiting transcription eliminated the asymmetrical pattern of inter-arm interactions. To this end, we treated Flip 2-5 cells with rifampicin (25  $\mu$ g/ml) for 30 min before fixing cells for Hi-C (Fig. 5B). Rifampicin inhibits transcription elongation in bacteria, thereby eliminating actively translocating RNA polymerases from the chromosome (Campbell et al., 2001). As we reported previously for wild-type cells, the inhibition of transcription reduced short-range intra-arm contacts (Le et al., 2013). In addition, for the Flip 2-5 strain, the vertical streak was eliminated and the inter-arm interactions reverted to a symmetric pattern on the diagonal (Fig. 5B, Fig. S7B), demonstrating that transcription is required for an asymmetrical inter-arm interaction pattern.

To further test the relationship between the orientation of highly expressed genes and SMC-dependent inter-arm interactions, we constructed three additional strains with different chromosomal inversions (Fig. 7A). We wondered if reversing the transcription orientation of a single highly-transcribing gene cluster, *i.e.* the rRNA gene cluster, would be sufficient to induce an asymmetrical inter-arm pattern. To test this possibility, we created the Flip 3-4 strain (Fig. 7A). The Hi-C map of G1-phase cells of the Flip 3-4 strain showed negligible changes to the inter-arm alignment compared to non-flipped cells (Fig. 7B-C). However, the inverted region in this strain is ~240 kb away from *parS* and, as noted above, SMC and SMC-dependent inter-arm interactions are strongest within a limited range around *parS*. Thus, we reasoned that the effect of an inverted rRNA cluster would be stronger if placed closer to *parS*. We did so by constructing the Flip 2-4 strain that has DNA between +3788 kb and +4030 kb inverted (Fig. 7A). Note that we could not easily relocate or insert a second ribosomal rRNA cluster next to *parS*. Hi-C on G1-phase cells of the Flip 2-4 strain showed a pronounced asymmetrical inter-arm interaction pattern (~20° deviation from a diagonal, starting after 80 kb from *ori*), though less dramatic than that of the Flip 2-5 cells in which several highly expressed genes in addition to the rRNA locus were inverted (Fig. 7B-C, Fig. 5B).

We further investigated the effect of transcription orientation bias on chromosomal arm alignment by inverting a DNA segment between +3611 kb and +3788 kb, the Flip 4-5 strain. Although this section does not contain an rRNA gene cluster, it includes four highly-transcribed

operons that normally transcribe in the *ori-ter* direction in wild-type cells (Fig. 7A, denoted with square brackets in Fig. 5A). Preceding this segment, DNA between +3788 kb and +4030 kb is largely free of highly-expressed genes oriented toward *ori/parS* (Fig. 5A). Hi-C on G1-phase cells of the Flip 4-5 strain showed two distinct phases of inter-arm contacts (Fig. 7B-C). The first phase (~290 kb) is a typical set of symmetrical inter-arm contacts as seen in wild-type cells. The second phase coincides with the inverted DNA segment and has a pronounced asymmetrical inter-arm pattern (Fig. 7B-C). Lastly, inhibition of transcription by treating Flip 2-4 or Flip 4-5 cells with rifampicin eliminated the asymmetrical pattern of inter-arm interactions (Fig. S7D). Collectively, our results emphasize that highly-transcribed genes, depending on their transcriptional direction, can dramatically influence the action of SMC and the global organization of a chromosome.

## DISCUSSION

### Conflicts between SMC and RNA polymerase, and the consequences for bacterial chromosome organization

Chromosomes in all organisms are typically laden with DNA-bound proteins that likely influence the dynamics and movement of SMC (Davidson et al., 2016; Kanke et al., 2016; Ocampo-Hafalla et al., 2016; Stigler et al., 2016; Wang et al., 2017). Time-resolved ChIP-seq in *Saccharomyces cerevisiae* showed pre-existing cohesin being pushed along the chromosome by the transcription machinery at ~0.5 kb per min (Ocampo-Hafalla et al., 2016). Similarly, short-range relocation of budding yeast condensin (SMC2/4) and the SMC5/6 complex by RNA polymerase has been observed (D'Ambrosio et al., 2008; Jeppsson et al., 2014; Johzuka and Horiuchi, 2007). Our results indicate that the distribution and translocation of *Caulobacter* SMC, and the consequent alignment of chromosomal arms, is also strongly influenced by RNA polymerase and actively transcribed genes, particularly those oriented toward *ori*.

In bacteria, the transcription of high-expression genes is notably biased to the *ori-ter* direction (Fig. S6) (Guy and Roten, 2004; Rocha, 2008; Rocha and Danchin, 2003). The co-orientation of DNA replication and transcription reduces the chance of head-on collisions between RNA and DNA polymerases, which can disrupt transcription, obstruct replication, and elevate the rate of mutagenesis (Hamperl and Cimprich, 2016; Merrikh et al., 2012). Here, we showed using Hi-C that reversing this *ori-ter* directional bias in a segment of the chromosome as small as ~180 kb induced a major change in the chromosome organization in *Caulobacter* (Fig. 7), preventing the symmetric alignment of chromosome arms.

The chromosome organization defect that results from highly expressed genes oriented toward *ori* likely stems from a conflict between SMC and transcription, without involving the replisome. This conclusion is based on two key observations. First, the experiments involving strains with inverted chromosomal regions were performed on synchronous G1-phase *Caulobacter* cells, *i.e.* non-replicating cells. Second, the Flip 1-5 strain, where the SMC loading site (*parS*) was relocated to a mid-arm position, has highly-expressed genes (such as the ribosomal RNA gene cluster) transcribing in the opposite direction to that of the replisome in actively replicating cells. However, this strain did not exhibit a dramatic off-diagonal pattern of DNA interactions (Fig. 4C). Thus, we suggest that head-on conflicts between translocating SMC and RNA polymerase can directly shape bacterial chromosome organization. Additionally, our results on G1 cells demonstrate that DNA replication is not required for SMC translocation or its maintenance on the chromosome.

Given the widespread directional bias of transcription in bacteria (Rocha, 2008), the high conservation of SMC (Nolivos and Sherratt, 2014), and the fact that *parS* is typically positioned close to *ori* in most bacteria (Livny et al., 2007), we suspect that a relationship between transcription and SMC similar to that documented here is relevant in other bacteria. Indeed, the rate of SMC-induced alignment of *parS*-flanking DNA in *B. subtilis* also appears to be

reduced by convergent transcription (Wang et al., 2017). An enrichment of highly-transcribed genes on the leading strand of replication has also been observed in certain regions of the human genome (Huvel et al., 2007) suggesting that a coordination of transcription orientation and SMC translocation may also be relevant in higher organisms.

The mechanism(s) that drive translocation of bacterial SMC from *parS* remains unknown. It is tempting to speculate that the *ori-ter* transcription bias might indicate that transcription helps push SMC away from its *ori*-proximal loading site. However, chromosome arm alignment in wild-type *Caulobacter* cells treated with rifampicin, which globally inhibits transcription, is slightly extended, not reduced (Fig. S8A-B). *E. coli* MukBEF, a non-canonical SMC, has been proposed to translocate via a “rope climber” mechanism (Badrinarayanan et al., 2012). In this model, a concerted opening and closing of just one MukBEF dimer in a handcuffed dimer-dimer allows an opened dimer to grab the next DNA segment before releasing the previously closed MukBEF, thereby “swinging” the dimer-dimer complex down DNA (Badrinarayanan et al., 2012). In *B. subtilis*, recent structural studies suggested that ATP binding, hydrolysis, and release can switch SMC between a rod- and a ring-like conformational states, with this motor-like cycling somehow mediating SMC translocation (Bürmann et al., 2013; Minnen et al., 2016). However, none of these current models can explain the *directional* movement of SMC from its loading site.

Whether smaller DNA-binding proteins can affect SMC translocation is not clear yet. The structural transition of *B. subtilis* SMC between a rod-shaped conformation (small lumen) and a ring-shaped conformation (large lumen) suggests that smaller protein-DNA complexes might also influence the dynamics of SMC on the chromosome. Recent *in vitro* single-molecule experiments in fission yeast showed cohesin’s mobility on flow-stretched DNA was impaired by nucleosomes and other DNA-bound proteins of various size (Stigler et al., 2016). In bacteria, there is a small but highly abundant histone-like protein called HU (Badrinarayanan et al., 2015a). We have seen that chromosome arm alignment in *Caulobacter* cells lacking HU extends further than that of wild-type cells (Fig. S8C-D), implying that SMC translocation might normally be restricted by HU.

### **SMC loading at the bacterial centromere *parS* site: a coupling between chromosome organization and segregation**

Our results support the notion that *Caulobacter* SMC is, like in *B. subtilis*, recruited at or near *parS*, loaded in a ParB-dependent manner, and then redistributed towards *ter*. The Hi-C profile of cells depleted of ParB showed a similar loss in inter-arm interactions as observed with SMC, ScpA, and ScpB mutants (Fig. 1B-D, Fig. 2). Also, the *Caulobacter* SMC ChIP-seq profile indicates, as with *B. subtilis* SMC (Gruber and Errington, 2009; Marbouty et al., 2015; Minnen et al., 2016; Wang et al., 2017), highest enrichment near *parS*, with a progressive decrease toward *ter*. This pattern is consistent with SMC being recruited at or near *parS* and then redistributing toward *ter*.

Whether *Caulobacter* ParB directly loads SMC at *parS* is not clear yet. ParB does not show sequence or structural similarity to eukaryotic SMC loader proteins such as NIPBL/Scp2 (Uhlmann, 2016). But there is evidence in *B. subtilis* and *S. pneumoniae* that ParB interacts with and directly loads SMC (Gruber and Errington, 2009; Marbouty et al., 2015; Minnen et al., 2016; Sullivan et al., 2009; Wang et al., 2015). A previous report found that *Caulobacter* SMC and ParB co-localized sparsely, but ParB did not co-immunoprecipitate with SMC (Schwartz and Shapiro, 2011). However, this negative result may reflect a transient and weak interaction between SMC and ParB. A transient interaction would be advantageous in enabling the SMC complex to redistribute away from the initial point of loading.

ParB is a bacterial-specific protein, but likely works closely with and coevolves with SMC to ensure chromosome organization and chromosome segregation in bacteria. Interestingly, *S. pneumoniae* lacks a ParA homolog, yet retains ParB-*parS* to recruit SMC (Minnen et al.,

2011), underscoring the tight connection of ParB and SMC. It is worth noting that, unlike *B. subtilis*, deleting the SMC-encoding gene in a wide range of bacteria, including *Caulobacter* as well as *Streptomyces coelicolor*, *Staphylococcus aureus* and *S. pneumoniae*, does not cause sensitivity to high temperature or fast-growing conditions (Le et al., 2013; Nolivos and Sherratt, 2014). Conversely however, ParA-ParB-*parS* is essential in *Caulobacter* but not in *B. subtilis* (Mohl and Gober, 1997; Mohl et al., 2001; Murray and Errington, 2008). The ParA-ParB-*parS* system and the SMC complex likely collaborate to ensure proper chromosome segregation and organization, but with slightly different contributions or relative weights in different organisms. Finally, we note that in  $\gamma$ -proteobacteria such as *E. coli* or *V. cholerae*, there is a distant SMC homolog, called the MukBEF system (Nolivos and Sherratt, 2014). Notably, ParA-ParB-*parS* systems do not exist in these bacteria, leaving open the question of how MukBEF complex loads on the chromosome, assuming it requires a specific loader (Nolivos and Sherratt, 2014). *E. coli* MukBEF was found, by ChIP-seq, to enrich at the replication terminus. We also observed a slight enrichment of *Caulobacter* SMC near the *ter* region (Fig. 4A-B). The enrichment of *Caulobacter* SMC near *ter* might occur via a *parS*-independent *E. coli*-like mechanism, however it does not result in DNA alignment in this area (Fig. 1B). The mechanism of SMC enrichment at *ter* is currently unknown in *Caulobacter*.

### Evidence that bacterial SMC tethers chromosomal arms together

The *Caulobacter* SMC complex promotes interactions between loci at approximately equivalent positions on opposite arms of the chromosome up to at least 600 kb from *parS*. It could be that SMC physically tethers the arms together (an “active alignment” model). Alternatively, SMC could promote alignment passively by compacting each arm separately, reducing the cytoplasmic mobility of each arm and thereby increasing inter-arm interactions (a “passive” alignment model). The Hi-C patterns documented here for the wild-type and various inversion strains are most easily explained by the active alignment model in which SMC physically links DNA from both arms together (Fig. 8). Such a model is also appealing given the notion that SMC can topologically entrap DNA. Moreover, contact probability curves derived from the Hi-C data, which reflect global chromosome compaction, were generally very similar for  $\Delta smc$  and wild-type cells (Le et al., 2013), suggesting that SMC plays only a minor role in intra-arm compaction in *Caulobacter*.

In the “active alignment” model, also suggested by studies of *B. subtilis* SMC (Wang et al., 2017), the inter-arm interactions documented by Hi-C may reflect loop generation by SMC (Fig. 8). In wild-type cells, DNA from each chromosomal arm may be effectively threaded through SMC at approximately similar rates as SMC moves towards *ter* and away from *parS* (Fig. 8A-B). In the inversion strains, DNA on the left arm may be threaded through SMC less efficiently than the right arm due to conflicts with convergent transcription (Fig. 8C). As suggested for eukaryotic SMC, loop extrusion or loop enlargement may be a general mechanism for folding chromosomes or bringing distant loci together (Alipour and Marko, 2012; Fudenberg et al., 2016; Goloborodko et al., 2016; Nasmyth, 2001). Processive loop extrusion/enlargement by SMC is also an efficient way to potentially resolve and linearly compact sister chromosomes in a manner that facilitates chromosome segregation (Nasmyth, 2001).

The active arm alignment and loop extrusion model raises the question of how SMC molecules distinguish intra-arm DNA from inter-arm DNA. Hypothetically, if SMC topologically entraps both DNA duplexes right at the *parS* loading site, instead of just a single duplex, SMC would be able to translocate downwards to *ter* while tethering both arms of the chromosome (Fig. 8A). Structural studies of SMC in *B. subtilis* showed that the lumen of this ring-shape complex is large enough to accommodate two DNA duplexes (Bürmann et al., 2013). Further, ParB is known to spread non-specifically on DNA from a *parS* site to bridge flanking DNA together (Breier and Grossman, 2007; Graham et al., 2014) such that SMC loaded at *parS* may be effectively trap the DNA duplexes of each arm (Fig. 8A). In *B. subtilis*, the spreading/bridging



property of ParB is essential for an efficient SMC recruitment and inter-arm interactions (Graham et al., 2014; Wang et al., 2015).

Although we favor a model in which SMC is loaded at *parS* sites and physically tethers the chromosomal arms together, our results suggest that SMC is not uniformly distributed across the genome and that SMC may, in fact, not translocate the full distance from *ori* to *ter*, as suggested for *B. subtilis*. SMC-dependent, arm-arm interactions in *Caulobacter* are substantially more prominent in the first ~600 kb of the two chromosomal arms. Additionally, our ChIP-seq profile for SMC indicated clear enrichment mainly in this same ~600 kb region. And finally, our microscopy studies (Fig. 4E) demonstrated that different regions of the chromosome responded quite differently to a global extension of the chromosome, as occurs in elongated cells. The *parS*-proximal regions where SMC is most enriched remained well-aligned in elongated cells, whereas *parS*-distal regions became significantly less well-aligned, indicating that the two arms were not as tightly cohesed together in these regions.

In *Bacillus*, DNA-bound SMC, as judged by ChIP analysis, also gradually decreased away from *parS*, but the arm-arm alignment was maintained more consistently from *ori* to *ter* (Gruber and Errington, 2009; Wang et al., 2015). Why does the extent of arm alignment differ in the two organisms and what might cause SMC dissociation from the chromosome? The ATPase activity of the SMC "head" domain is thought to regulate loading as well as ring opening and closing (Minnen et al., 2016). Potentially, if the SMC ring opens, DNA can escape and SMC can dissociate from the chromosome. The intrinsic ATPase rate of *Caulobacter* SMC is reportedly different from that of *Bacillus* SMC (Schwartz and Shapiro, 2011). This difference might lead to a different rate of ring opening/closing, resulting in different extents of arm alignment between the two organisms. Alternatively, or in addition, SMC may suffer more frequent conflict with convergently transcribed genes, or be more sensitive to dissociation following such conflicts, leading to less extensive arm-arm interaction.

The extent to which the two arms "zip up" may not matter. If the primary role of SMC-mediated arm-arm interactions is to help enforce the individualization of sister chromosomes immediately after DNA replication, it may only be necessary to ensure that SMC can cohes *parS*-proximal regions of each chromosome. Indeed, in *Caulobacter*, ParA-ParB-*parS* are only required for the segregation of *ori*-proximal DNA, but not of the distal DNA loci (Badrinarayanan et al., 2015b). Once the *ori*-proximal DNA is properly segregated, by SMC and ParA-ParB-*parS*, distal DNA regions follow suit, driven by separate molecular machinery, or more likely without the need of a dedicated system (Badrinarayanan et al., 2015b). In such a case, it may be sufficient to have SMC tether together only a limited region of DNA flanking the *parS* sites. This model would imply that conflicts between SMC and highly expressed genes oriented toward *ori* are most detrimental, with respect to chromosome segregation, if they occur in close proximity to *parS*. Testing this model and further understanding the relationship of SMC and gene expression and its influence on chromosome organization is an important challenge for the future.

## ACKNOWLEDGMENTS

We thank Anjana Badrinarayanan, Hugo Brandao, Matt Bush, and Monica Guo for discussion and comments on the manuscript. We thank Lucy Shapiro, Martin Thanbichler, Marie Elliot and Susan Schlimpert for materials. This study was supported by a Royal Society University Research Fellowship (UF140053), a Royal Society Research Grant (RG150448) to T.B.K.L. and a BBSRC grant-in-add (BBS/E/J/000C0683) to the John Innes Centre. M.T.L. is an Investigator of the Howard Hughes Medical Institute.



## REFERENCES

- Alipour, E., and Marko, J.F. (2012). Self-organization of domain structures by DNA-loop-extruding enzymes. *Nucleic Acids Res.* **40**, 11202–11212.
- Badrinarayanan, A., Reyes-Lamothe, R., Uphoff, S., Leake, M.C., and Sherratt, D.J. (2012). In vivo architecture and action of bacterial structural maintenance of chromosome proteins. *Science* **338**, 528–531.
- Badrinarayanan, A., Le, T.B.K., and Laub, M.T. (2015a). Bacterial Chromosome Organization and Segregation. *Annu. Rev. Cell Dev. Biol.* **31**, 171–199.
- Badrinarayanan, A., Le, T.B.K., and Laub, M.T. (2015b). Rapid pairing and resegregation of distant homologous loci enables double-strand break repair in bacteria. *J. Cell Biol.* **210**, 385–400.
- Breier, A.M., and Grossman, A.D. (2007). Whole-genome analysis of the chromosome partitioning and sporulation protein Spo0J (ParB) reveals spreading and origin-distal sites on the *Bacillus subtilis* chromosome. *Mol. Microbiol.* **64**, 703–718.
- Bürmann, F., Shin, H.-C., Basquin, J., Soh, Y.-M., Giménez-Oya, V., Kim, Y.-G., Oh, B.-H., and Gruber, S. (2013). An asymmetric SMC–kleisin bridge in prokaryotic condensin. *Nat. Struct. Mol. Biol.* **20**, 371–379.
- Campbell, E.A., Korzheva, N., Mustaev, A., Murakami, K., Nair, S., Goldfarb, A., and Darst, S.A. (2001). Structural mechanism for rifampicin inhibition of bacterial rna polymerase. *Cell* **104**, 901–912.
- Cuylen, S., Metz, J., and Haering, C.H. (2011). Condensin structures chromosomal DNA through topological links. *Nat. Struct. Mol. Biol.* **18**, 894–901.
- D'Ambrosio, C., Schmidt, C.K., Katou, Y., Kelly, G., Itoh, T., Shirahige, K., and Uhlmann, F. (2008). Identification of cis-acting sites for condensin loading onto budding yeast chromosomes. *Genes Dev.* **22**, 2215–2227.
- Davidson, I.F., Goetz, D., Zaczek, M.P., Molodtsov, M.I., Veld, P.J.H. in 't, Weissmann, F., Litos, G., Cisneros, D.A., Ocampo-Hafalla, M., Ladurner, R., et al. (2016). Rapid movement and transcriptional re-localization of human cohesin on DNA. *EMBO J.* **35**, 2671–2685.
- Epshtein, V., Toulmé, F., Rahmouni, A.R., Borukhov, S., and Nudler, E. (2003). Transcription through the roadblocks: the role of RNA polymerase cooperation. *EMBO J.* **22**, 4719–4727.
- Figge, R.M., Easter, J., and Gober, J.W. (2003). Productive interaction between the chromosome partitioning proteins, ParA and ParB, is required for the progression of the cell cycle in *Caulobacter crescentus*. *Mol. Microbiol.* **47**, 1225–1237.
- Fudenberg, G., Imakaev, M., Lu, C., Goloborodko, A., Abdennur, N., and Mirny, L.A. (2016). Formation of Chromosomal Domains by Loop Extrusion. *Cell Rep.* **15**, 2038–2049.
- Goloborodko, A., Marko, J.F., and Mirny, L.A. (2016). Chromosome Compaction by Active Loop Extrusion. *Biophys. J.* **110**, 2162–2168.
- Graham, T.G.W., Wang, X., Song, D., Etson, C.M., Oijen, A.M. van, Rudner, D.Z., and Loparo, J.J. (2014). ParB spreading requires DNA bridging. *Genes Dev.* **28**, 1228–1238.
- Gruber, S., and Errington, J. (2009). Recruitment of condensin to replication origin regions by ParB/Spo0J promotes chromosome segregation in *B. subtilis*. *Cell* **137**, 685–696.

Guy, L., and Roten, C.-A.H. (2004). Genometric analyses of the organization of circular chromosomes: a universal pressure determines the direction of ribosomal RNA genes transcription relative to chromosome replication. *Gene* 340, 45–52.

Hamperl, S., and Cimprich, K.A. (2016). Conflict Resolution in the Genome: How Transcription and Replication Make It Work. *Cell* 167, 1455–1467.

Hirano, M., Anderson, D.E., Erickson, H.P., and Hirano, T. (2001). Bimodal activation of SMC ATPase by intra- and inter-molecular interactions. *EMBO J.* 20, 3238–3250.

Huvet, M., Nicolay, S., Touchon, M., Audit, B., d'Aubenton-Carafa, Y., Arneodo, A., and Thermes, C. (2007). Human gene organization driven by the coordination of replication and transcription. *Genome Res.* 17, 1278–1285.

Ivanov, D., and Nasmyth, K. (2005). A Topological Interaction between Cohesin Rings and a Circular Minichromosome. *Cell* 122, 849–860.

Jensen, R.B., and Shapiro, L. (1999). The *Caulobacter crescentus* *smc* gene is required for cell cycle progression and chromosome segregation. *Proc. Natl. Acad. Sci. USA* 96, 10661–10666.

Jeppsson, K., Carlborg, K.K., Nakato, R., Berta, D.G., Lilienthal, I., Kanno, T., Lindqvist, A., Brink, M.C., Dantuma, N.P., Katou, Y., et al. (2014). The Chromosomal Association of the Smc5/6 Complex Depends on Cohesion and Predicts the Level of Sister Chromatid Entanglement. *PLOS Genet.* 10, e1004680.

Johzuka, K., and Horiuchi, T. (2007). RNA polymerase I transcription obstructs condensin association with 35S rRNA coding regions and can cause contraction of long repeat in *Saccharomyces cerevisiae*. *Genes Cells* 12, 759–771.

Kahng, L.S., and Shapiro, L. (2003). Polar Localization of Replicon Origins in the Multipartite Genomes of *Agrobacterium tumefaciens* and *Sinorhizobium meliloti*. *J. Bacteriol.* 185, 3384–3391.

Kanke, M., Tahara, E., Huis In't Veld, P.J., and Nishiyama, T. (2016). Cohesin acetylation and Wapl-Pds5 oppositely regulate translocation of cohesin along DNA. *EMBO J.* 35, 2686–2698.

Le, T.B., and Laub, M.T. (2016). Transcription rate and transcript length drive formation of chromosomal interaction domain boundaries. *EMBO J.* 35, 1582–1595.

Le, T.B., Imakaev, M.V., Mirny, L.A., and Laub, M.T. (2013). High-resolution mapping of the spatial organization of a bacterial chromosome. *Science* 342, 731–734.

Lengronne, A., Katou, Y., Mori, S., Yokobayashi, S., Kelly, G.P., Itoh, T., Watanabe, Y., Shirahige, K., and Uhlmann, F. (2004). Cohesin relocation from sites of chromosomal loading to places of convergent transcription. *Nature* 430, 573–578.

Lieberman-Aiden, E., van Berkum, N.L., Williams, L., Imakaev, M., Ragoczy, T., Telling, A., Amit, I., Lajoie, B.R., Sabo, P.J., Dorschner, M.O., et al. (2009). Comprehensive mapping of long-range interactions reveals folding principles of the human genome. *Science* 326, 289–293.

Lim, H.C., Surovtsev, I.V., Beltran, B.G., Huang, F., Bewersdorf, J., and Jacobs-Wagner, C. (2014). Evidence for a DNA-relay mechanism in ParABS-mediated chromosome segregation. *eLife* 3, e02758.

Lin, D.C.-H., and Grossman, A.D. (1998). Identification and Characterization of a Bacterial Chromosome Partitioning Site. *Cell* 92, 675–685.

Livny, J., Yamaichi, Y., and Waldor, M.K. (2007). Distribution of Centromere-Like parS Sites in Bacteria: Insights from Comparative Genomics. *J. Bacteriol.* **189**, 8693–8703.

Marbouty, M., Le Gall, A., Cattoni, D.I., Cournac, A., Koh, A., Fiche, J.-B., Mozziconacci, J., Murray, H., Koszul, R., and Nollmann, M. (2015). Condensin- and Replication-Mediated Bacterial Chromosome Folding and Origin Condensation Revealed by Hi-C and Super-resolution Imaging. *Mol. Cell* **59**, 588–602.

Mascarenhas, J., Soppa, J., Strunnikov, A.V., and Graumann, P.L. (2002). Cell cycle-dependent localization of two novel prokaryotic chromosome segregation and condensation proteins in *Bacillus subtilis* that interact with SMC protein. *EMBO J.* **21**, 3108–3118.

Merrikh, H., Zhang, Y., Grossman, A.D., and Wang, J.D. (2012). Replication-transcription conflicts in bacteria. *Nat. Rev. Microbiol.* **10**, 449–458.

Minnen, A., Attaiach, L., Thon, M., Gruber, S., and Veening, J.-W. (2011). SMC is recruited to oriC by ParB and promotes chromosome segregation in *Streptococcus pneumoniae*. *Mol. Microbiol.* **81**, 676–688.

Minnen, A., Bürmann, F., Wilhelm, L., Anchimiuk, A., Diebold-Durand, M.-L., and Gruber, S. (2016). Control of SMC Coiled Coil Architecture by the ATPase Heads Facilitates Targeting to Chromosomal ParB/parS and Release onto Flanking DNA. *Cell Rep.* **14**, 2003–2016.

Mohl, D.A., and Gober, J.W. (1997). Cell cycle-dependent polar localization of chromosome partitioning proteins in *Caulobacter crescentus*. *Cell* **88**, 675–684.

Mohl, D.A., Easter, J., and Gober, J.W. (2001). The chromosome partitioning protein, ParB, is required for cytokinesis in *Caulobacter crescentus*. *Mol. Microbiol.* **42**, 741–755.

Murayama, Y., and Uhlmann, F. (2014). Biochemical reconstitution of topological DNA binding by the cohesin ring. *Nature* **505**, 367–371.

Murray, H., and Errington, J. (2008). Dynamic control of the DNA replication initiation protein DnaA by Soj/ParA. *Cell* **135**, 74–84.

Nasmyth, K. (2001). Disseminating the genome: joining, resolving, and separating sister chromatids during mitosis and meiosis. *Annu. Rev. Genet.* **35**, 673–745.

Nolivos, S., and Sherratt, D. (2014). The bacterial chromosome: architecture and action of bacterial SMC and SMC-like complexes. *FEMS Microbiol. Rev.* **38**, 380–392.

Nolivos, S., Upton, A.L., Badrinarayanan, A., Müller, J., Zawadzka, K., Wiktor, J., Gill, A., Arciszewska, L., Nicolas, E., and Sherratt, D. (2016). MatP regulates the coordinated action of topoisomerase IV and MukBEF in chromosome segregation. *Nat. Commun.* **7**, 10466.

Ocampo-Hafalla, M., Muñoz, S., Samora, C.P., and Uhlmann, F. (2016). Evidence for cohesin sliding along budding yeast chromosomes. *Open Biol.* **6**, 150178.

Rocha, E.P.C. (2008). The Organization of the Bacterial Genome. *Annu. Rev. Genet.* **42**, 211–233.

Rocha, E.P.C., and Danchin, A. (2003). Essentiality, not expressiveness, drives gene-strand bias in bacteria. *Nat. Genet.* **34**, 377–378.

Schwartz, M.A., and Shapiro, L. (2011). An SMC ATPase mutant disrupts chromosome segregation in *Caulobacter*. *Mol Microbiol* **82**, 1359–1374.

Shebelut, C.W., Guberman, J.M., van Teeffelen, S., Yakhnina, A.A., and Gitai, Z. (2010). *Caulobacter* chromosome segregation is an ordered multistep process. *Proc. Natl. Acad. Sci. USA* **107**, 14194–14198.

Soppa, J., Kobayashi, K., Noirot-Gros, M.-F., Oesterhelt, D., Ehrlich, S.D., Dervyn, E., Ogasawara, N., and Moriya, S. (2002). Discovery of two novel families of proteins that are proposed to interact with prokaryotic SMC proteins, and characterization of the *Bacillus subtilis* family members ScpA and ScpB. *Mol. Microbiol.* **45**, 59–71.

Stigler, J., Çamdere, G.Ö., Koshland, D.E., and Greene, E.C. (2016). Single-Molecule Imaging Reveals a Collapsed Conformational State for DNA-Bound Cohesin. *Cell Rep.* **15**, 988–998.

Sullivan, N.L., Marquis, K.A., and Rudner, D.Z. (2009). Recruitment of SMC by ParB-parS Organizes the Origin Region and Promotes Efficient Chromosome Segregation. *Cell* **137**, 697–707.

Taylor, J.A., Pastrana, C.L., Butterer, A., Pernstich, C., Gwynn, E.J., Sobott, F., Moreno-Herrero, F., and Dillingham, M.S. (2015). Specific and non-specific interactions of ParB with DNA: implications for chromosome segregation. *Nucleic Acids Res.* **43**, 719–731.

Teytelman, L., Thurtle, D.M., Rine, J., and van Oudenaarden, A. (2013). Highly expressed loci are vulnerable to misleading ChIP localization of multiple unrelated proteins. *Proc. Natl. Acad. Sci. U. S. A.* **110**, 18602–18607.

Thanbichler, M., and Shapiro, L. (2006). MipZ, a Spatial Regulator Coordinating Chromosome Segregation with Cell Division in *Caulobacter*. *Cell* **126**, 147–162.

Toro, E., Hong, S.-H., McAdams, H.H., and Shapiro, L. (2008). *Caulobacter* requires a dedicated mechanism to initiate chromosome segregation. *Proc. Natl. Acad. Sci.* **105**, 15435–15440.

Uhlmann, F. (2016). SMC complexes: from DNA to chromosomes. *Nat. Rev. Mol. Cell Biol.* **17**, 399–412.

Umbarger, M.A., Toro, E., Wright, M.A., Porreca, G.J., Bau, D., Hong, S.H., Fero, M.J., Zhu, L.J., Marti-Renom, M.A., McAdams, H.H., et al. (2011). The three-dimensional architecture of a bacterial genome and its alteration by genetic perturbation. *Mol Cell* **44**, 252–264.

Viollier, P.H., Thanbichler, M., McGrath, P.T., West, L., Meewan, M., McAdams, H.H., and Shapiro, L. (2004). Rapid and sequential movement of individual chromosomal loci to specific subcellular locations during bacterial DNA replication. *Proc Natl Acad Sci U A* **101**, 9257–9262.

Wang, X., Montero Llopis, P., and Rudner, D.Z. (2013). Organization and segregation of bacterial chromosomes. *Nat Rev Genet* **14**, 191–203.

Wang, X., Le, T.B.K., Lajoie, B.R., Dekker, J., Laub, M.T., and Rudner, D.Z. (2015). Condensin promotes the juxtaposition of DNA flanking its loading site in *Bacillus subtilis*. *Genes Dev.* **29**, 1661–1675.

Wang, X., Brandão, H.B., Le, T.B.K., Laub, M.T., and Rudner, D.Z. (2017). *Bacillus subtilis* SMC complexes juxtapose chromosome arms as they travel from origin to terminus. *Science* **355**, 524–527.

Wilhelm, L., Bürmann, F., Minnen, A., Shin, H.-C., Toseland, C.P., Oh, B.-H., and Gruber, S. (2015). SMC condensin entraps chromosomal DNA by an ATP hydrolysis dependent loading mechanism in *Bacillus subtilis*. *eLife* **4**, e06659.

Figure 1

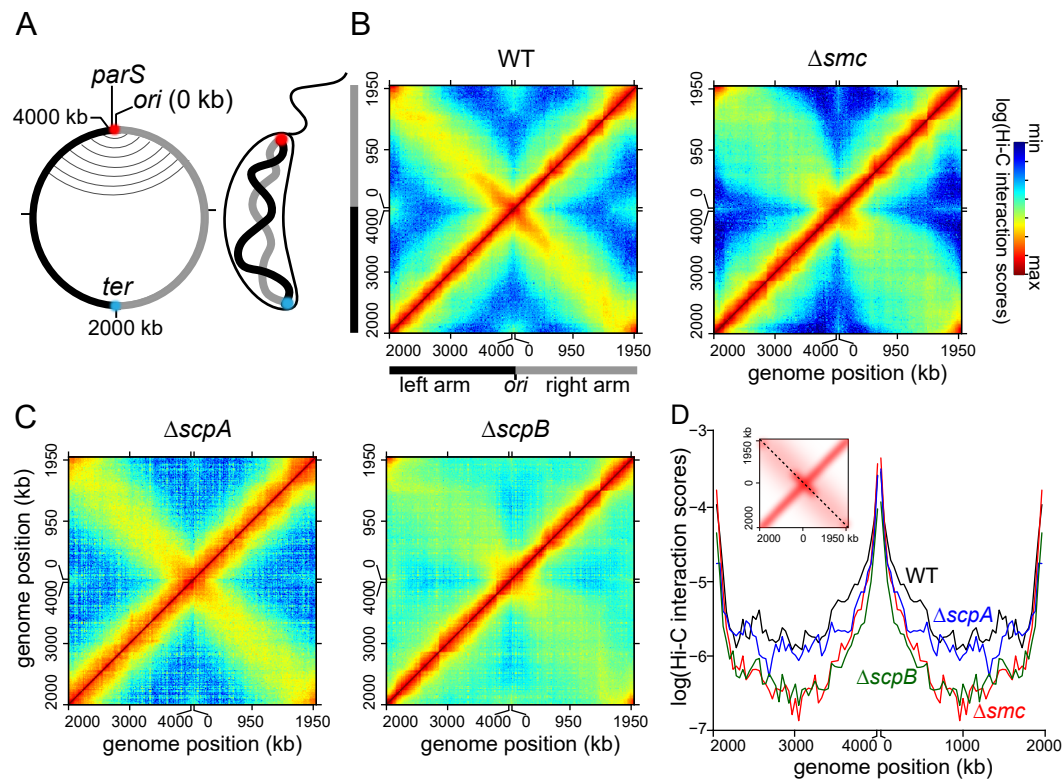



# Fig 1. The SMC-ScpA-ScpB complex promotes the alignment of chromosomal arms

**(A)** A simplified genomic map of *Caulobacter* showing the origin of replication (*ori*), the bacterial centromere site (*parS*) and the terminus (*ter*), together with left (black) and the right (grey) chromosomal arms. On the genomic map, aligned DNA regions are presented schematically as grey curved lines connecting the left and the right chromosomal arm. Spatially, the *ori* (red) resides at one cell pole, the *ter* (cyan) at the opposite pole and the two arms running in parallel down the long axis of the cell. **(B)** Normalized Hi-C contact maps showing the logarithm of DNA-DNA contacts for pairs of 10 kb-bins across the genome of wild-type (WT) and  $\Delta smc$  cells (Le et al., 2013). The *ori* is positioned at the center of the x- and y-axis of Hi-C maps, and the left and the right chromosomal arm are on either side. **(C)** Normalized Hi-C contact maps for  $\Delta scpA$  and  $\Delta scpB$  cells. **(D)** Hi-C interaction scores along the diagonal from the upper left corner to the lower right corner (indicated as a black dashed line in the inset) for contact maps of WT,  $\Delta smc$ ,  $\Delta scpA$  and  $\Delta scpB$  cells. Bins near *ori* (0/4043 kb) or near *ter* (2000 kb) are dominated by intra-arm instead of inter-arm DNA-DNA interactions due to a circular bacterial genome.

Figure 2

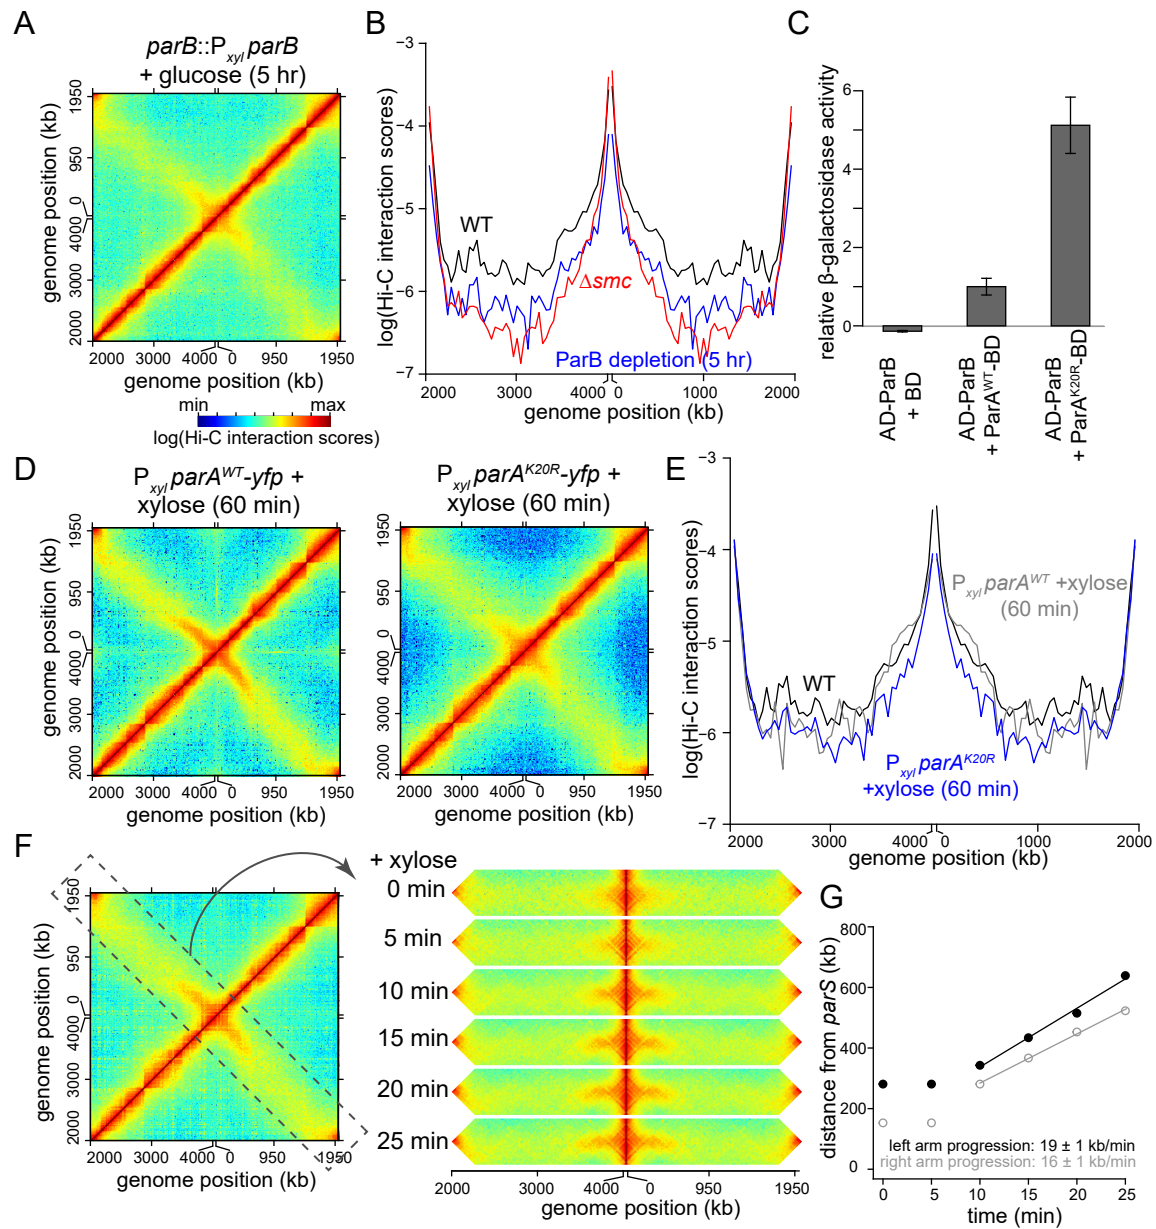

## Fig 2. ParB is required for the progressive alignment of chromosomal arms by SMC

**(A)** Normalized Hi-C maps for *parB::P<sub>xyI</sub> parB* cells 5 hrs after withdrawing xylose and adding glucose to repress *P<sub>xyI</sub>* activity and deplete ParB. **(B)** Hi-C interaction scores along the diagonal from the upper left corner to the lower right corner for contact maps of WT (black),  $\Delta smc$  (red), and *parB::P<sub>xyI</sub> parB* cells (blue) 5 hrs after starting the depletion experiment. **(C)** Yeast two hybrid assay to compare ParB-ParA<sup>WT</sup> interaction to that of ParB-ParA<sup>K20R</sup>. ParB was expressed as a fusion to the activation domain of Gal4 (AD), and ParA<sup>WT</sup> or ParA<sup>K20R</sup> as a fusion to the DNA-binding domain of Gal4 (BD). The  $\beta$ -galactosidase activity was assayed for each strain and is presented relative to the value obtained for the ParB-ParA<sup>WT</sup> interaction. Error bars represent standard deviation from four biological replicates. **(D)** Normalized Hi-C maps for cells expressing *parA<sup>WT</sup>-yfp* and *parA<sup>K20R</sup>-yfp* after adding xylose for 1 hr. **(E)** Hi-C interaction scores along the diagonal from the upper left corner to the lower right corner for contact maps of WT (black), cells expressing *parA<sup>WT</sup>-yfp* (grey), and *parA<sup>K20R</sup>-yfp* (blue) after adding xylose for 1 hr. **(F)** A time-resolved Hi-C for cells that are replenishing of ParB. *parB::P<sub>xyI</sub> parB* cells at the end of the 5 hr depletion period was washed off glucose and supplemented with xylose to induce ParB production. Time (in minutes) after adding back xylose was indicated next to each Hi-C strip. For presentation purposes, the secondary diagonal (black dashed box) was rotated and laid out horizontally. **(G)** Analysis of the progression of chromosomal arm alignment. The extent of DNA alignment at each time point after adding back xylose was plotted for each chromosomal arm. The black and grey lines are linear best fit lines for data from time point 10 min to 25 min. Analysis to determine the extent of DNA alignment is described in Fig. S2E and Supplementary Methods.

Figure 3

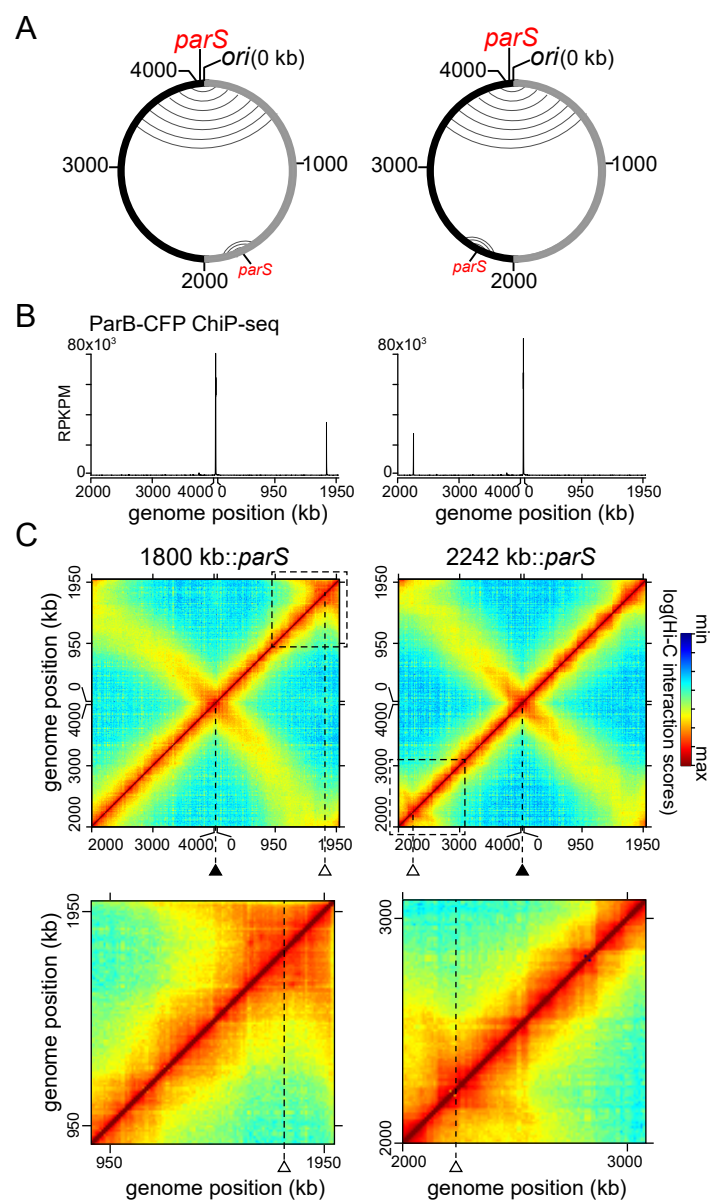

### Fig. 3. An ectopic *parS* induces the alignment of its flanking DNA

**(A)** Genomic maps show the locations of a 260 bp DNA fragment containing *parS* site that were engineered at +1800 kb and +2242 kb. Aligned DNA regions are presented as grey curved lines connecting the left and the right flanking of each *parS* site (see also panel **C**). **(B)** ChIP-seq profiles show ParB distribution in cells harbouring a second *parS* site at +1800 kb or at +2242 kb. ChIP-seq using  $\alpha$ -GFP antibody were performed in the above cells with *parB::cfp-parB* as the sole source of ParB. ChIP-seq enrichment was expressed as number of reads per kilobases per million of mapped reads (RPKPM). **(C)** Normalized Hi-C maps for the +1800 kb::*parS* and +2242 kb::*parS* cells. The solid and open triangles shows the position of the native and ectopic *parS* site, respectively. A 1000 kb region surrounding the ectopic *parS* site (black dashed box) were also zoomed in and presented below each whole-genome Hi-C contact map.



Figure 4

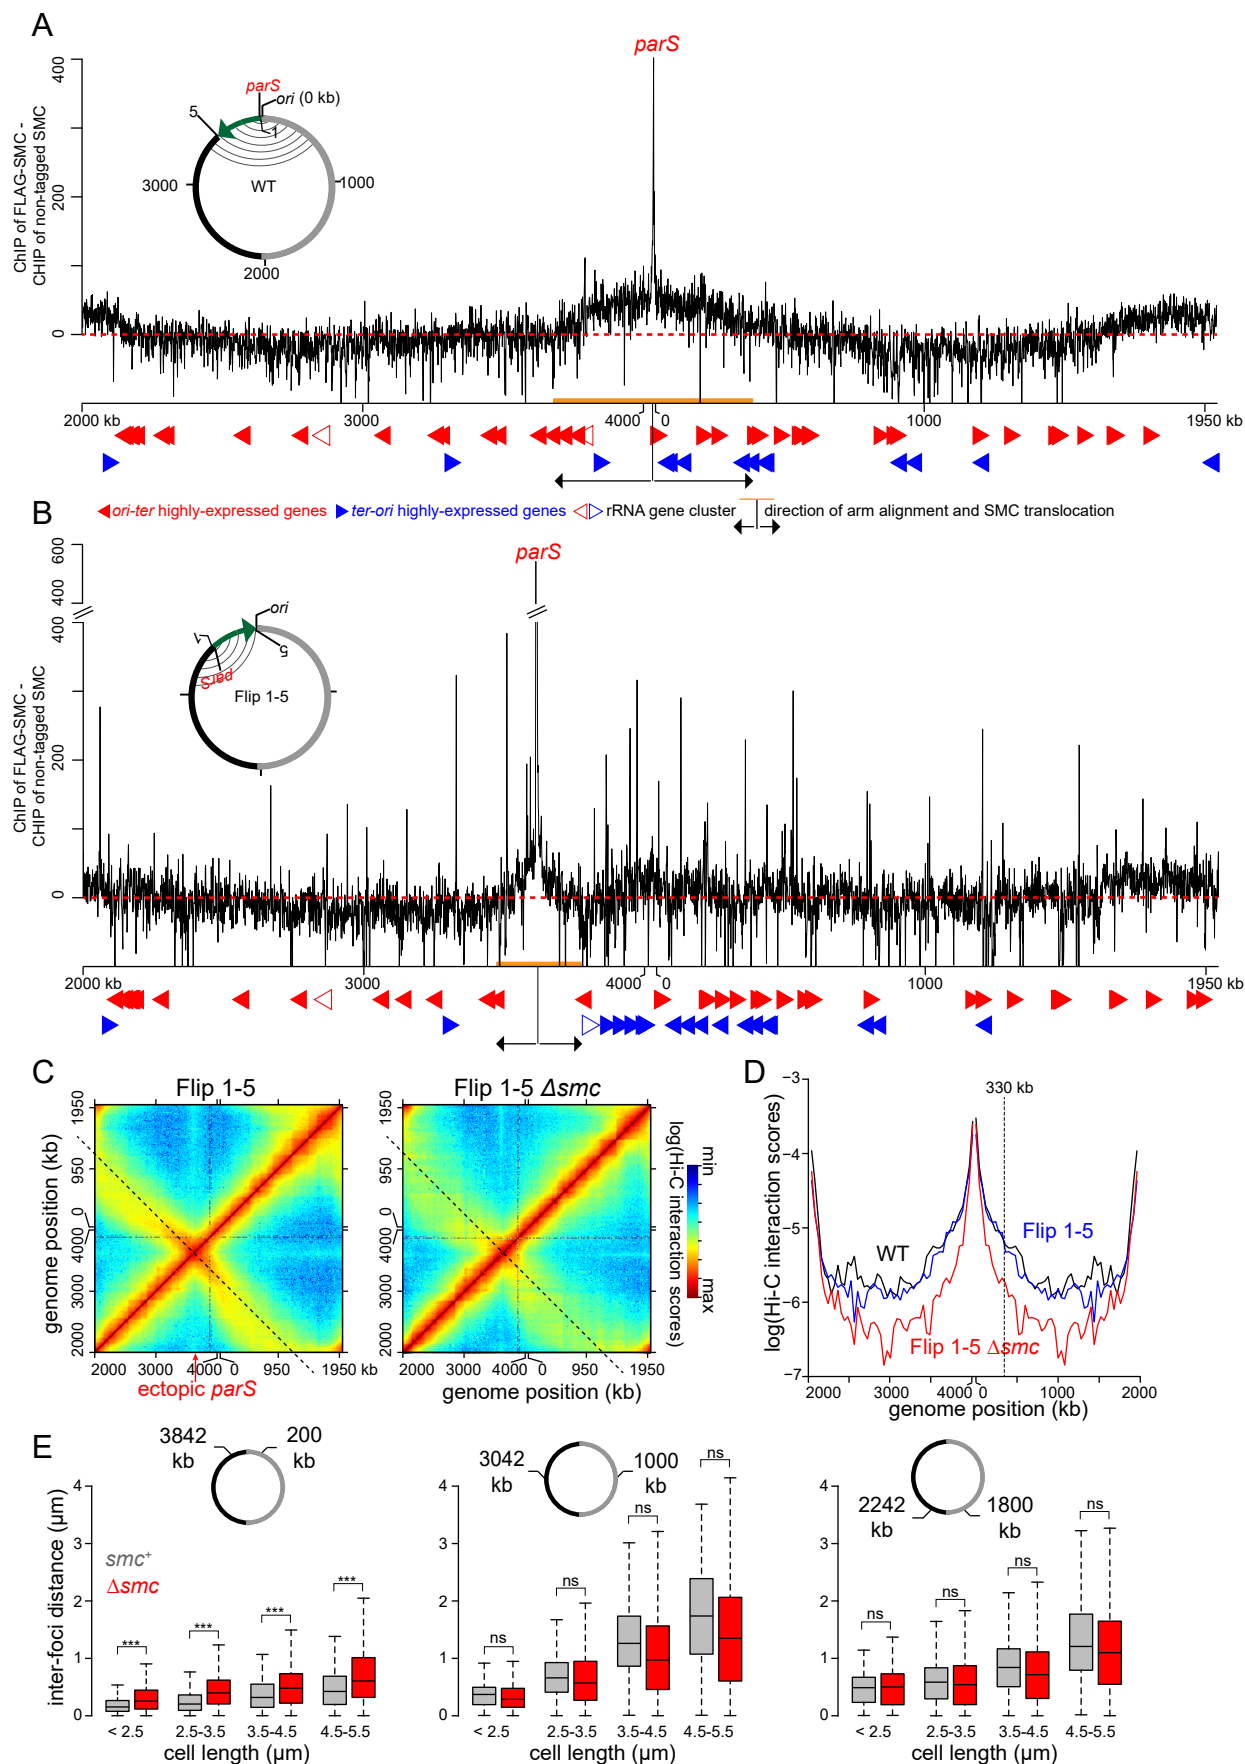

# **Fig. 4. SMC is enriched at the *parS* site and promotes DNA alignment most effectively for *parS*-proximal regions**

**(A)** The distribution of FLAG-tagged SMC on WT *Caulobacter* chromosome. DNA from both the  $\alpha$ -FLAG ChIP fraction of tagged-SMC and un-tagged SMC were deep sequenced. ChIP-seq signals were reported as the number of reads within every 1 kb bin along the genome in the ChIP fraction of FLAG-tagged SMC minus that of untagged SMC. The dashed red line shows y-axis value at 0. Below the ChIP-seq profile are the position of highly-expressed genes that transcribe in the *ori-ter* (solid red arrows) or *ter-ori* (solid blue arrows) direction. The positions of ribosomal rRNA gene cluster are indicated with open red or blue arrows. High expression genes (RPKPM\*gene length > 1000) were determined from  $\alpha$ -FLAG ChIP-seq in cells expressing *rpoC-flag* (See Fig. 5A and Fig. S6A and C). The direction and extent of SMC translocation from *parS* site were shown as black arrows and orange bar, respectively. A schematic genomic map of *Caulobacter* showing the position of *parS* (red) and *ori* are presented in the inset. The inverted DNA segment (green arrow) is indicated together with the end points of the inversion (1 and 5). On the genomic map, aligned DNA regions, as observed by Hi-C, are presented schematically as grey curved lines connecting the left and the right chromosomal arm. **(B)** The distribution of FLAG-tagged SMC on the chromosome of Flip 1-5 *Caulobacter*. **(C)** Normalized Hi-C maps for the Flip 1-5 and Flip 1-5  $\Delta smc$  cells. The genomic position of the relocated *parS* site in Flip 1-5 is indicated with a red arrow. **(D)** Hi-C interaction scores along the diagonal from the upper left corner to the lower right corner for contact maps of WT (black), Flip 1-5 (blue), and Flip 1-5  $\Delta smc$  cells (red). The Hi-C interaction scores along the secondary diagonal of Flip 1-5 and Flip 1-5  $\Delta smc$  cells (black dashed lines in panel C) was shifted to the same position as that of WT to enable comparison between strains. The vertical black dashed line at ~330 kb away from *ori* shows the position where Hi-C interaction scores along the secondary diagonal reduces in Flip 1-5 strain in comparison to WT. **(E)** Inter-foci distances expand differentially in elongated *Caulobacter* cells, depending on their genomic locations. Pairs of DNA loci were labelled with YFP-ParB<sup>pMT1</sup>/*parS*<sup>pMT1</sup> and mCherry-ParB<sup>P1</sup>/*parS*<sup>P1</sup> near *ori* (+200 kb and +3842 kb), at the middle of each arm (+1000 kb and +3042 kb), or near *ter* (+1800 kb and +2242 kb). Boxplots show the distribution of inter-foci distances for cells of different sizes with SMC (grey) or without (red) SMC. Asterisks indicate statistical significance (\*\*\*) P-value < 0.001; ns: not significant, one-tailed Student's t-test. Null hypothesis: inter-foci distance in  $\Delta smc$  is greater than in WT cells).



# **Fig. 5. Genomic context and transcription influences the SMC-mediated alignment of chromosomal arms**

**(A)** The abundance of RNA polymerases on genes that transcribe in the *ori-ter* direction (red) or in the *ter-ori* direction (blue) in WT and Flip 2-5 cells for the DNA segment between +3600 kb and +400 kb. The position of *parS* and the direction of SMC translocation are indicated with black arrows. For the whole genome plot, see Fig. S6. ChIP-seq using  $\alpha$ -FLAG antibody was performed on exponentially-growing cells expressing *rpoC-flag* from its native locus in WT background (upper panel) or in Flip 2-5 background (lower panel). Only pulled-down DNA from translocating RNA polymerases were used to generate this plot. Pulled-down DNA from initiating RNA polymerases at promoter regions were discarded *in silico*. The abundance of RNA polymerases was represented as RPKPM\*gene length for each gene and plotted against the genomic location of that gene. Due to short sequencing reads (50 bp) and the high similarity between the two ribosomal RNA clusters, it is not reliable to estimate the RNA polymerase density within each rRNA cluster. Therefore, enrichment data for rRNA gene clusters are not shown. Nevertheless, we indicate the genomic position of a highly-expressed rRNA cluster on *Caulobacter* genome with a dagger ( $\dagger$ ) symbol. Vertical black dashed lines with numbering 2 and 5 indicate the inversion end points (See also the schematic genome map on the right hand side). **(B)** Normalized Hi-C contact maps for Flip 2-5, Flip 2-5  $\Delta smc$  cells, and Flip 2-5 cells treated with rifampicin (25  $\mu$ g/ml) for 30 minutes. A 1000 kb region surrounding *parS/ori* were also zoomed in and presented below each whole-genome Hi-C contact map.

Figure 6

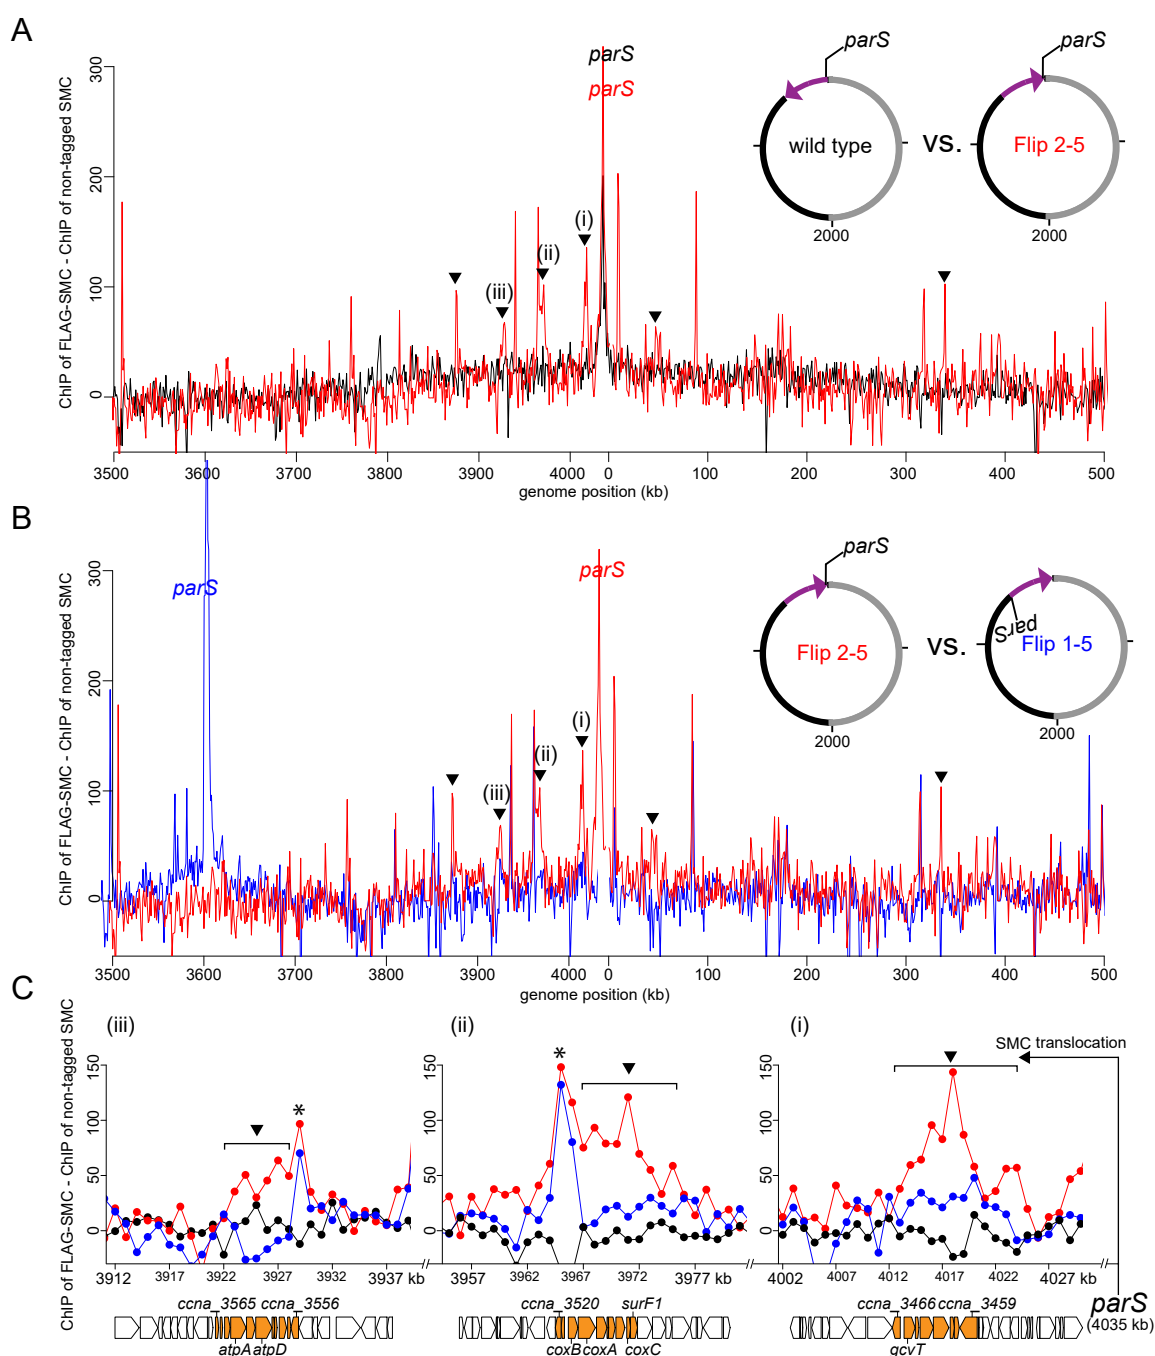



# Fig. 6. Head-on transcription alters the distribution of SMC on the chromosome

**(A)** The distribution of FLAG-tagged SMC on WT *Caulobacter* chromosome (black) and on Flip 2-5 chromosome (red). DNA from both the  $\alpha$ -FLAG ChIP fraction of tagged-SMC and untagged SMC were deep sequenced. ChIP-seq signals were reported as the number of reads within every 1 kb bin along the genome in the ChIP fraction of FLAG-tagged SMC minus that of untagged SMC. Only DNA segment between +3500 kb and +500 kb was shown. For profiles of the whole genome, see Fig. S4. **(B)** The distribution of FLAG-tagged SMC on Flip 1-5 (blue) and Flip 2-5 chromosome (red). Black triangles indicate new peaks in the ChIP-seq profile of Flip 2-5 but not in the profiles of WT or Flip 1-5 strain. The ChIP-seq profile of FLAG-SMC in Flip 1-5 strain was slightly shifted to align to that of Flip 2-5 strain since the inverted DNA segment in Flip 1-5 is larger than in Flip 2-5 by 8 kb to encompass the native *parS* region (See Fig. 4A-B and Fig. 5A). **(C)** The distribution of FLAG-tagged SMC at the glycine cleavage system gene cluster (panel i, highlighted in orange), the cytochrome c oxidase gene cluster (panel ii, highlighted in orange) and the ATP synthase gene cluster (panel iii, highlighted in orange). The genomic position of *parS* and the direction of SMC translocation are shown with a black arrow. The genomic positions (in kb) on the x-axis and the gene direction are those of Flip 2-5 strain. We inverted *in silico* the ChIP-seq profile and gene orientation of WT strain to enable comparison of superimposed ChIP-seq profiles. Black triangles indicate new peaks in the ChIP-seq profile of Flip 2-5 but not in the profiles of WT or Flip 1-5 strain. Black asterisks (\*) indicate non-specific peaks that often associate with “hyper-ChIPable” regions at highly-transcribed genes (Teytelman et al., 2013).

Figure 7

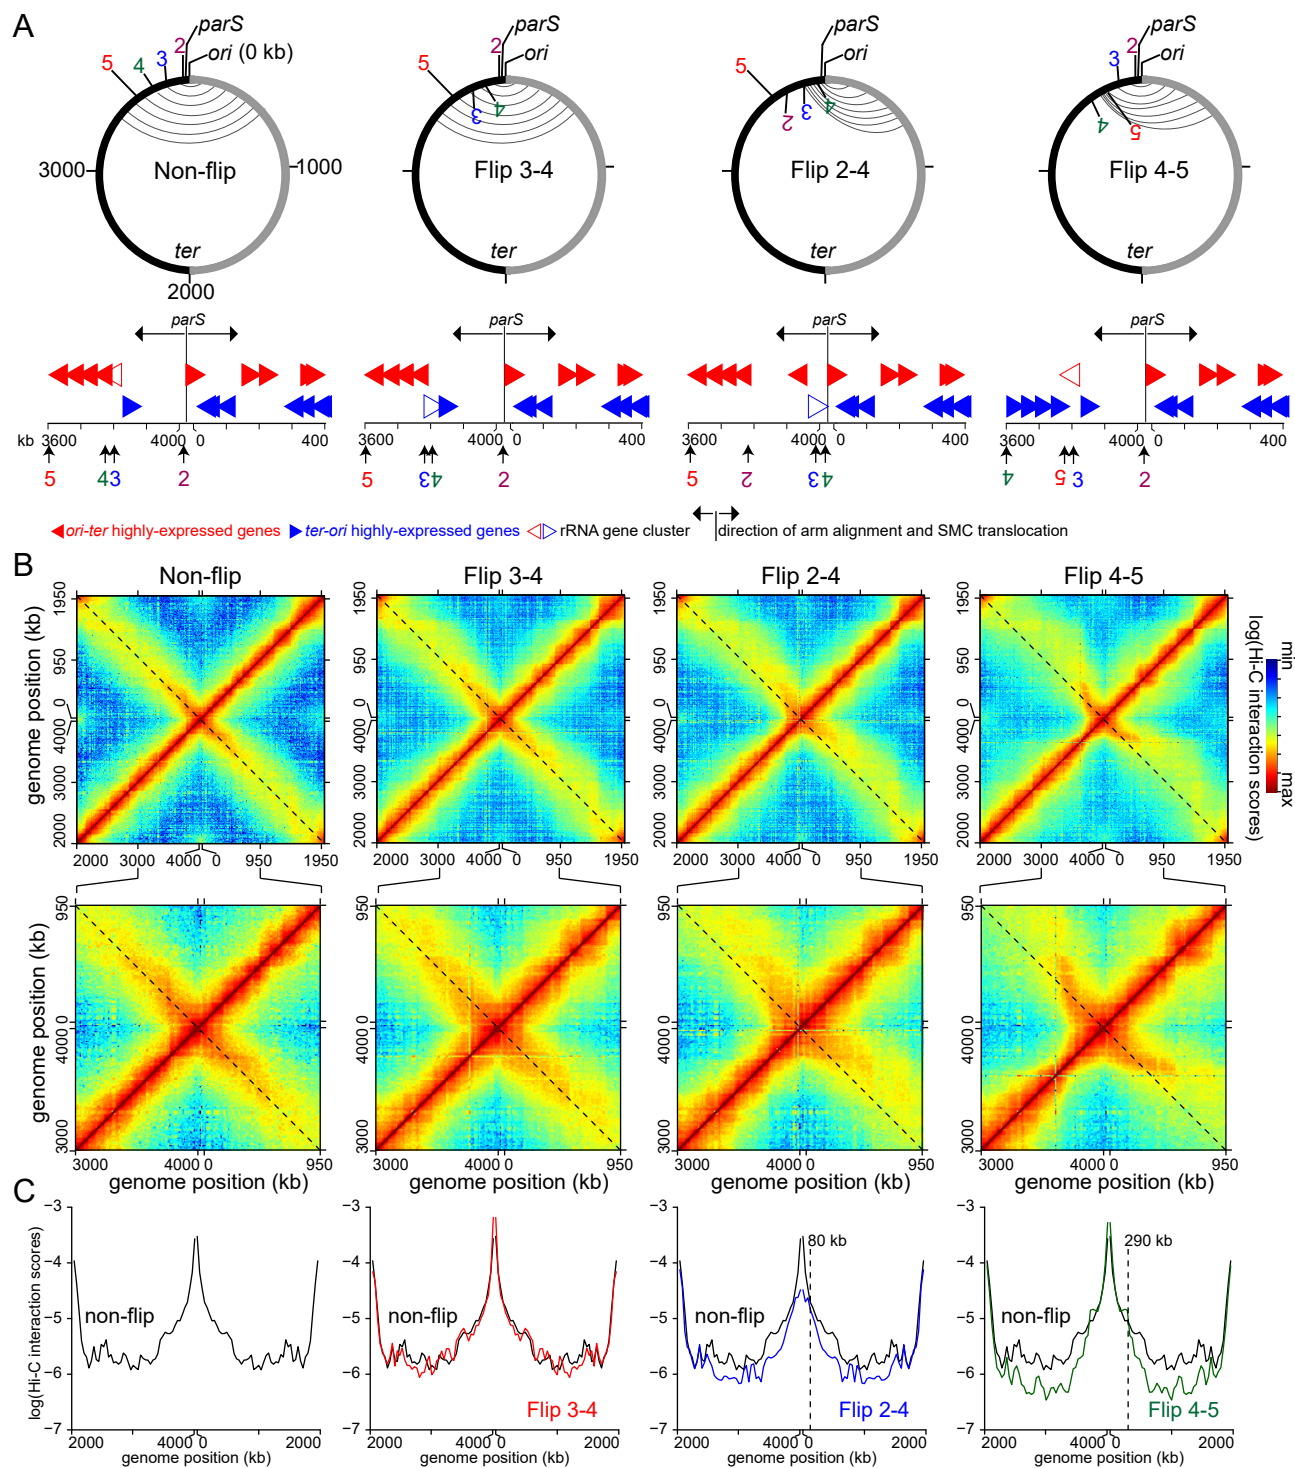

# **Fig. 7. Inverting 180 kb DNA segment containing highly-expressed *ori-ter* genes is sufficient to induce an asymmetrical pattern of inter-arm contacts**

**(A)** Schematic genomic maps for WT cells (non-flip) and the inversion strain Flip 3-4, Flip 2-4 and Flip 4-5. The inversion end points (2, 3, 4 and 5) together with the genomic location of *parS* and *ori* are indicated on the map. The aligned DNA regions, as observed by Hi-C (panel **B**), are presented schematically as grey curved lines connecting the left and the right chromosomal arms. Below each genomic map are the positions of highly-expressed genes that transcribe in the *ori-ter* (solid red arrows) or *ter-ori* (solid blue arrows) direction in each strain. The positions of ribosomal rRNA gene cluster are indicated with open red or blue arrows. The genomic position of *parS* and the direction of SMC translocation are shown with black arrows. Only 400-kb DNA segments surrounding *ori* are shown. **(B)** Normalized Hi-C contact maps for non-flip, Flip 3-4, Flip 2-4 and Flip 4-5 cells. The black dashed line indicates the diagonal of the square matrix. A 1000 kb region surrounding *parS/ori* were also zoomed in and presented below each whole-genome Hi-C contact map. **(C)** Hi-C interaction scores along the diagonal from the upper left corner to the lower right corner for contact maps of non-flip (black), Flip 3-4 (red), Flip 2-4 (blue), and Flip 4-5 cells (dark green). Vertical black dashed lines show position where Hi-C interaction scores reduce in the Flip strains compared to the non-flip strain.

Figure 8

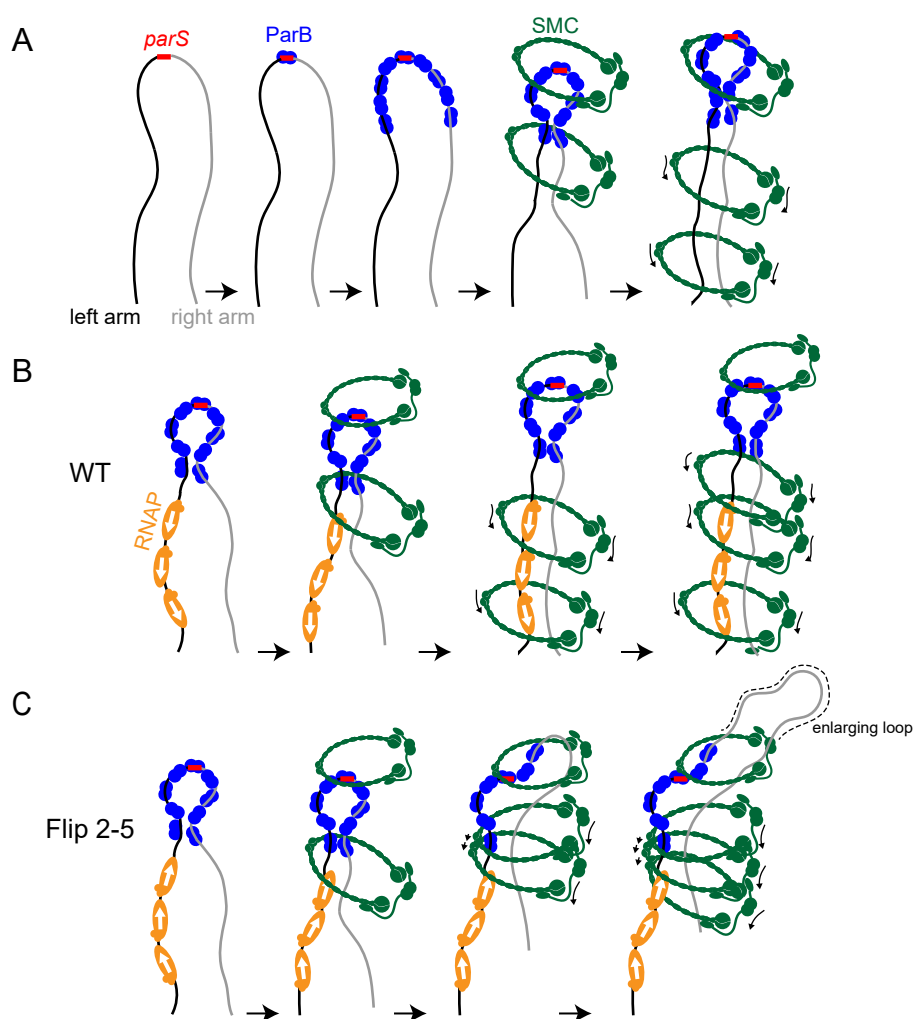

**Fig. 8. A schematic model for an active alignment of the left and right chromosomal arms by SMC.**

**(A)** ParB (blue) binds to the bacterial centromere *parS* site (red), spreads and might bridge the left (black) and the right (grey) chromosomal arms together. SMC (dark green) is recruited by ParB and most likely tether the two arms of the chromosome together. An SMC-ScpA-ScpB complex can either hold both chromosome arms within its lumen or two SMC complexes, each encircles one chromosome arm can handcuff to tether both arms together. For simplicity, only SMC encircling both arms are shown schematically. **(B-C)** A schematic model of how a high density of converging RNA polymerases (orange) might stall or dissociate SMC from the left chromosomal arm as can happen in the Flip 2-5 strain.
